# Supplementary material for: The cnidarian parasite Ceratonova shasta utilizes inherited and recruited venom-like compounds during infection
Source: PubMed Central journal article supplement (PMC8684318; doi:10.7717/peerj.12606), 2021-12-15

SeqID: TRINITY\_DN59953\_c0\_g1\_i1

Annotation: uncharacterized protein

Identified by seq analysis: N

Key: (X%; Y%) A / B X = Alignment coverage Y = %ID between query and temple A = Molecule name B = Molecule description  
NP= Alignment & %ID not provided by Phyre2; Green = same clade; Purple = Earlier common ancestor; Red = Non-valid entry; Blue = Not in tree

3T5O Chain A (Alignment coverage%; identity%) Complement Component C6/ Perforin domain of MAC

3T5O Chain A (24%; 18%) Complement Component C6/ Perforin domain of MAC

3GHN Chain A (37%; 20%) ADAMTS13 / von Willebrand factor protease

1FV3 Chain B

3R6B Chain A (23%/ 30%) Thrombospondin-1/ ECM glycoprotein

5NOC Chain B

1WOR Chain B (34%; 20%) Properdin / Antibody indep. Complement system

1YYN Chain A

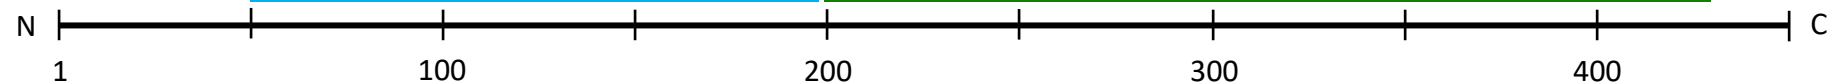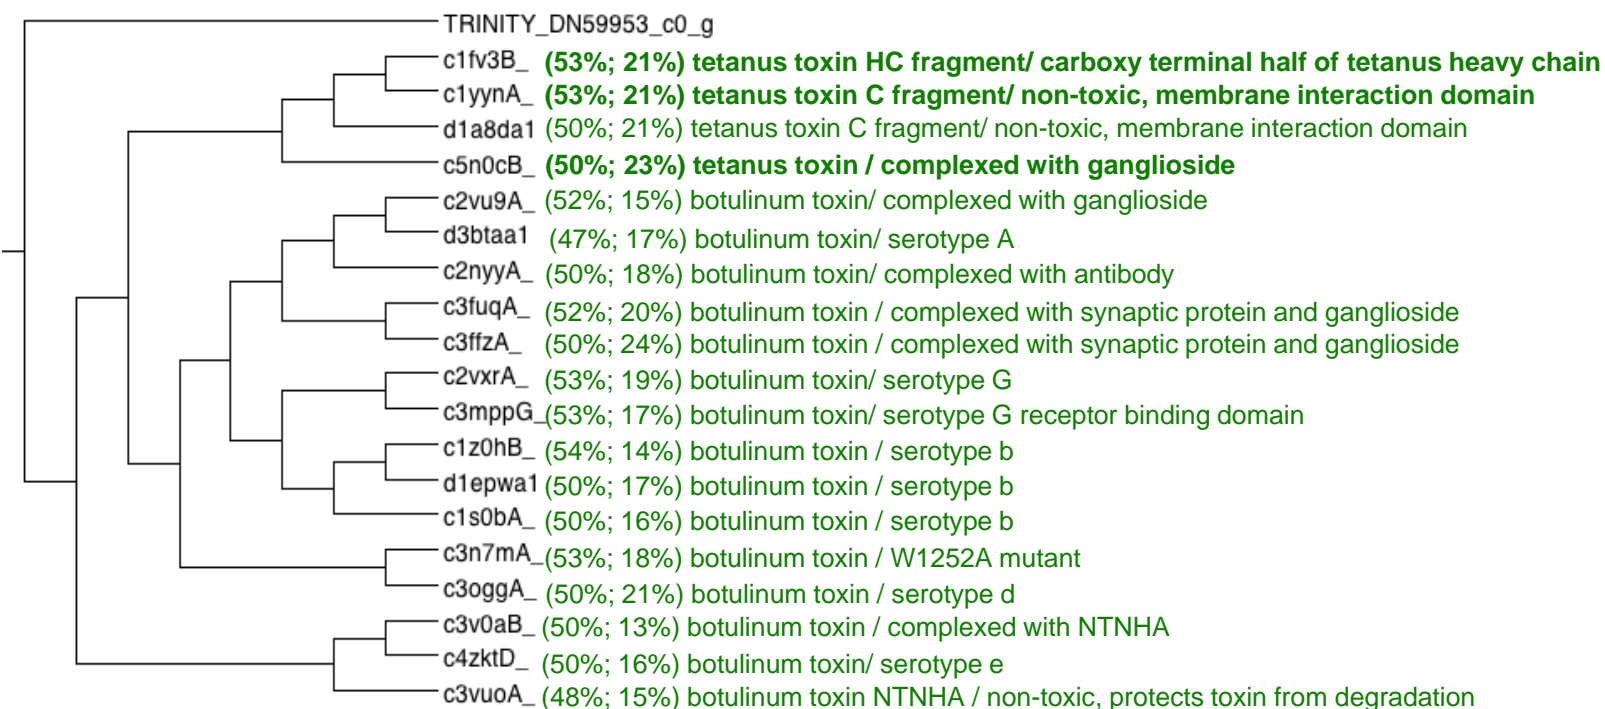

**SeqID:** TRINITY\_DN9306\_c0\_g1\_i1  
**Annotation:** Nematobalst-specific nb012a  
**Identified by seq analysis:** N

**Key:** (X%; Y%) A / B    X = Alignment coverage    Y = %ID between query and temple    A = Molecule name    B = Molecule description  
 NP= Alignment & %ID not provided by Phyre2; Green = same clade; Purple = Earlier common ancestor; Red = Non-valid entry; Blue = Not in tree

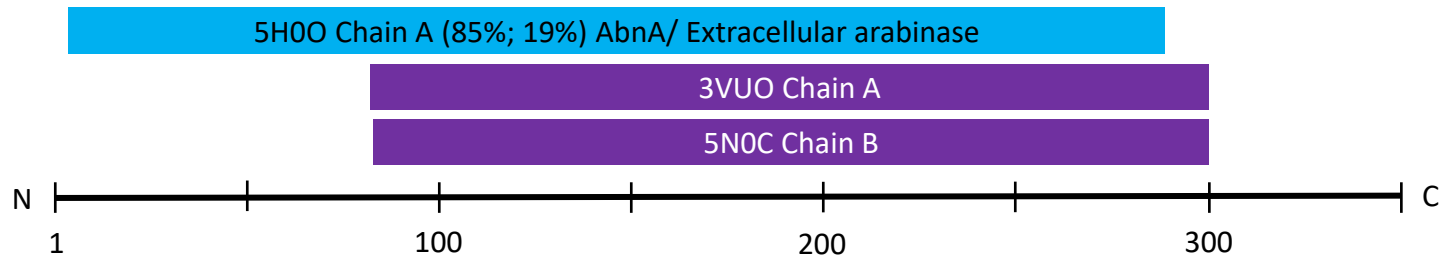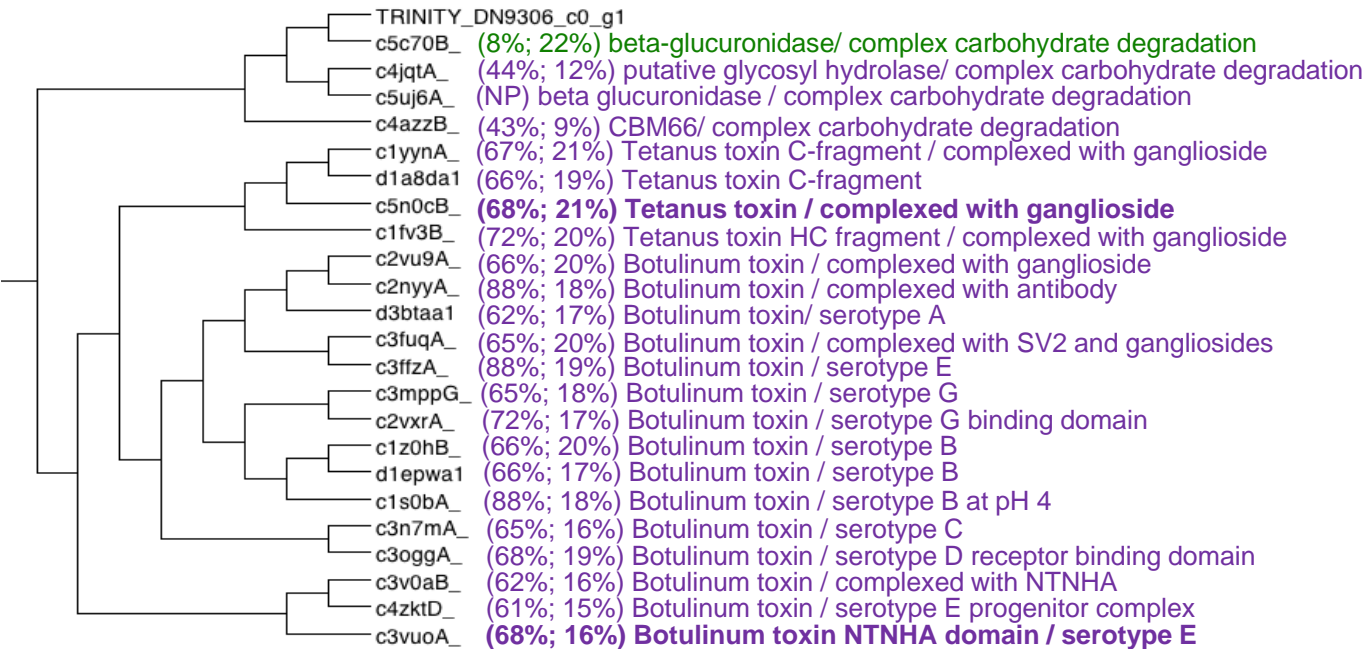

**SeqID:** TRINITY\_DN60481\_c0\_g1\_i1

**Annotation:** Nematogalectin C

**Identified by seq analysis:** Y

**Key:** (X%; Y%) A / B X = Alignment coverage Y= %ID between query and temple A = Molecule name B = Molecule description  
NP= Alignment & %ID not provided by Phyre2; Yellow = Sequence from database; Green = same clade; Purple = Earlier common ancestor;  
Red = Non-valid entry; Blue = Not in tree

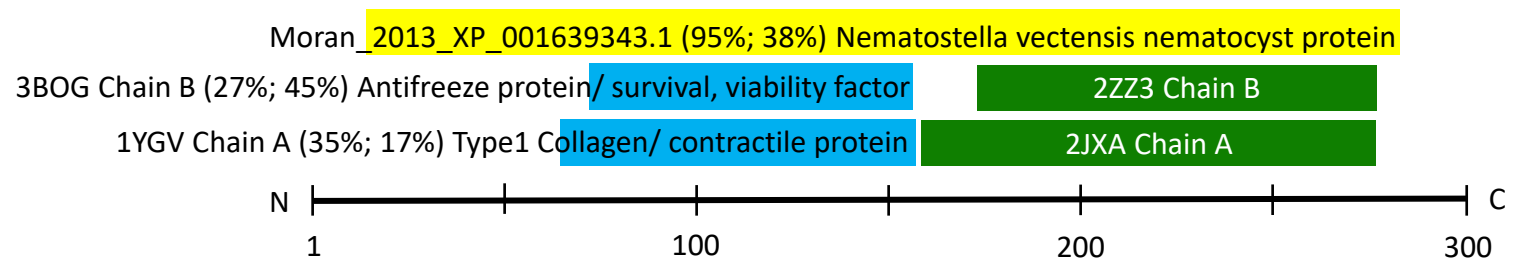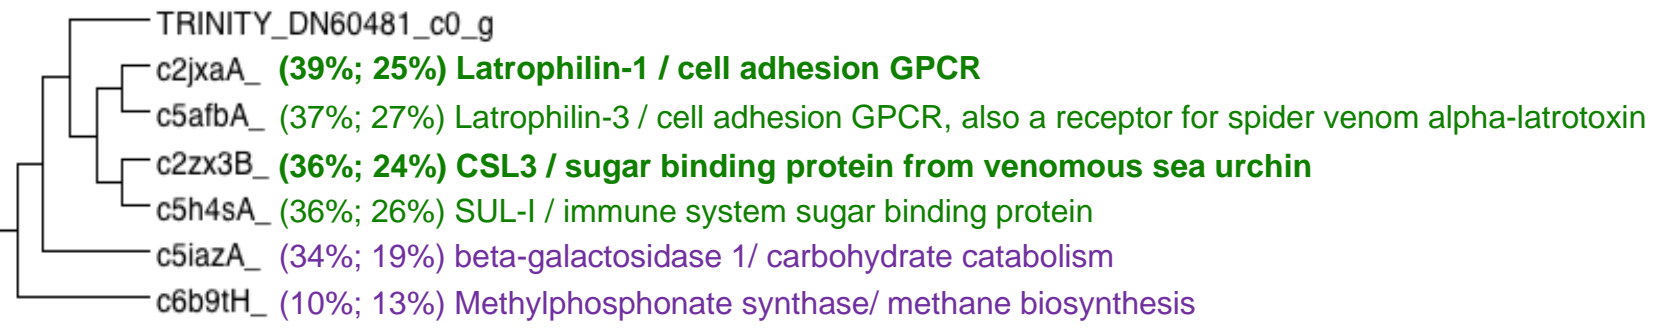

SeqID: TRINITY\_DN60393\_c0\_g1\_i1

Annotation: Nematogalectin-related

Identified by seq analysis: Y

**Key:** (X%; Y%) A / B X = Alignment coverage Y = %ID between query and temple A = Molecule name B = Molecule description  
NP= Alignment & %ID not provided by Phyre2; Yellow = Sequence from database; Green = same clade; Purple = Earlier common ancestor; Red = Non-valid entry; Blue = Not in tree

Moran\_2013\_XP\_001639420.1 (92%; 60%) *Nematostella vectensis* nematocyst protein

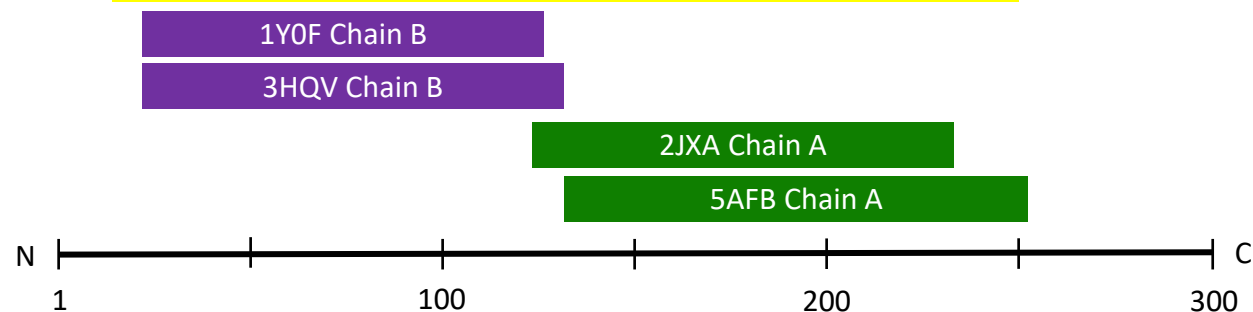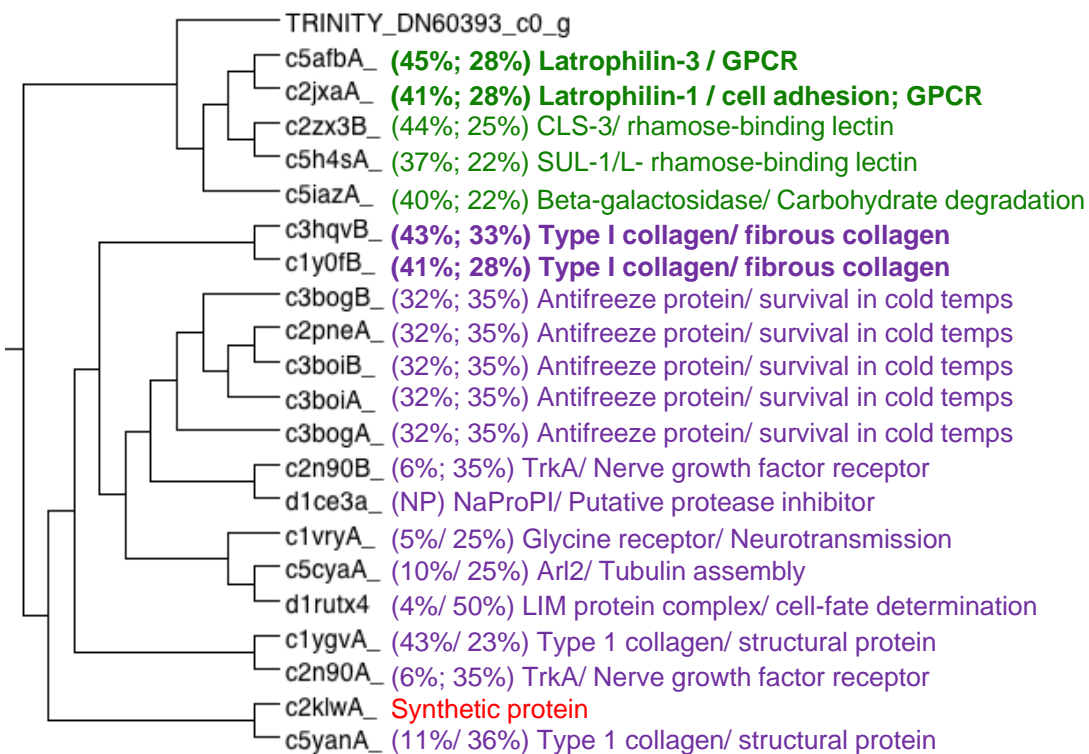

SeqID: TRINITY\_DN4616\_c0\_g1\_i1

Annotation: Macrophage mannose receptor 1-like

Identified by seq analysis: Y

**Key:** (X%; Y%) A / B    X = Alignment coverage    Y = %ID between query and temple    A = Molecule name    B = Molecule description  
NP= Alignment & %ID not provided by Phyre2; Yellow = Sequence from database ; Green = same clade; Purple = Earlier common ancestor; Red = Non-valid entry; Blue = Not in tree

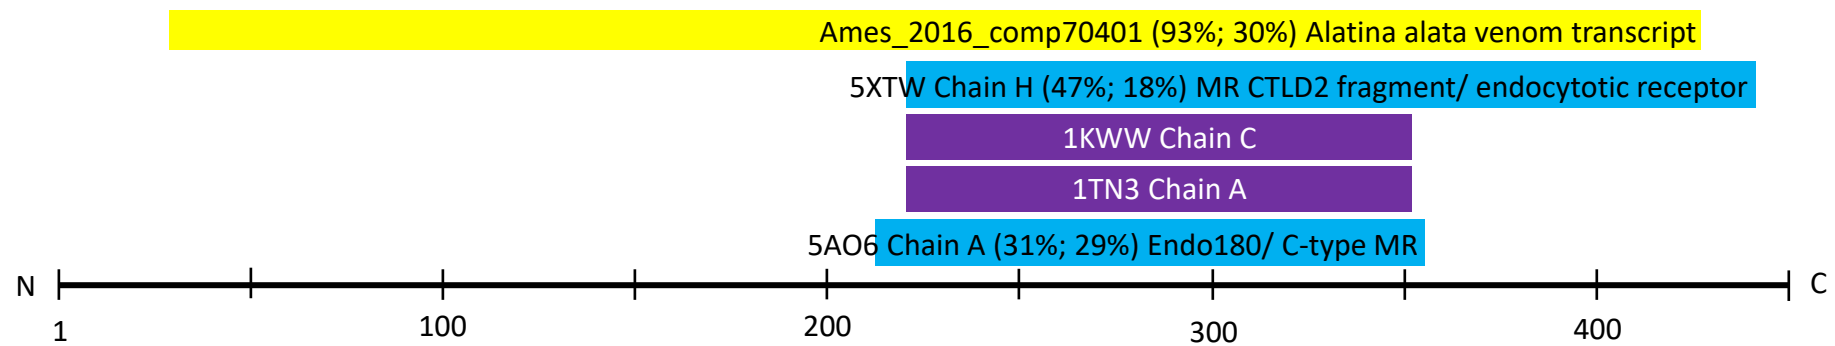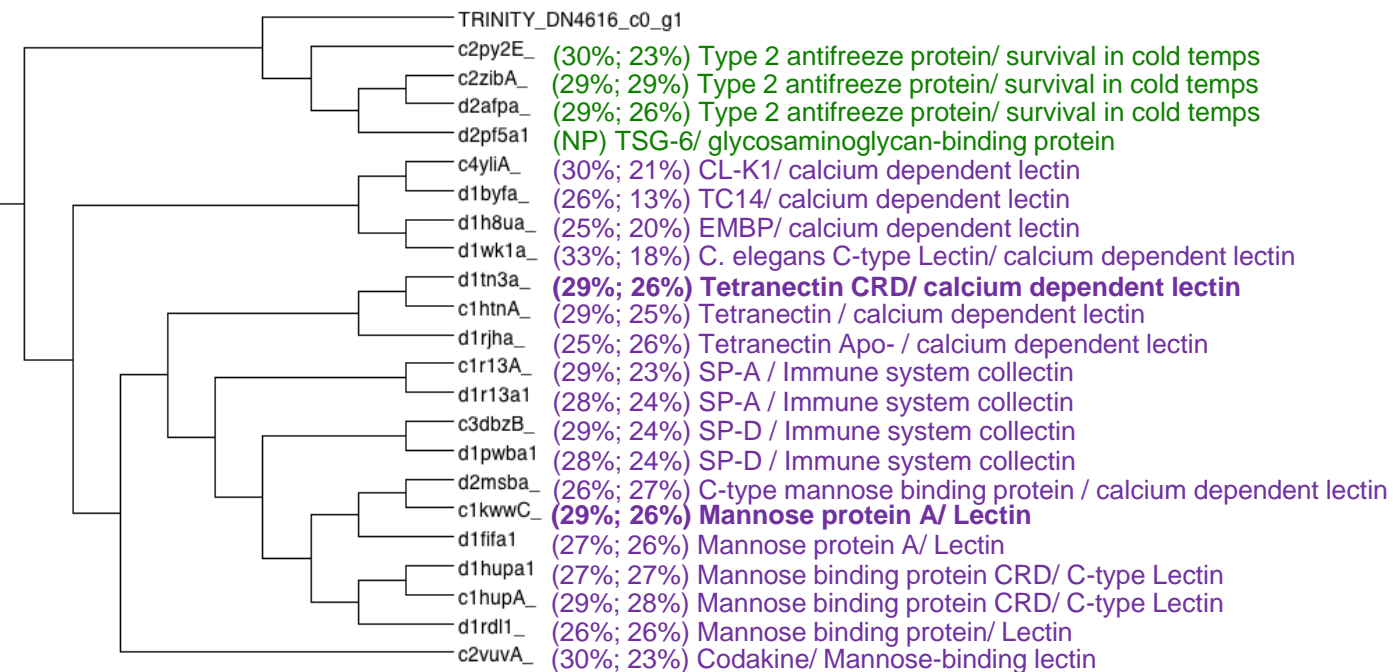

SeqID: TRINITY\_DN60348\_c0\_g1\_i1

Annotation: Nematogalectin A

Identified by seq analysis: Y

**Key:** (X%; Y%) A / B X = Alignment coverage Y = %ID between query and temple A = Molecule name B = Molecule description  
NP= Alignment & %ID not provided by Phyre2; Yellow = Sequence from database ; Green = same clade; Purple = Earlier common ancestor; Red = Non-valid entry; Blue = Not in tree

Moran\_2013\_XP\_001639343.1(86%; 56%) Nematostella vectensis nematocyst protein

5AFB Chain A (32%; 30%) Latrophilin-3/ cell adhesion GPCR

2JXA Chain A (33%; 26%) Latrophilin-1/ cell adhesion GPCR

1Y0F Chain B 2ZX3 Chain B (37%; 25%) CSL3 / Rhamnose-binding lectin

3HQV Chain B 5H4S Chain A (37%; 22%) SUL-I / Rhamnose-binding lectin

1YGV Chain A 5IAZ Chain A (29%; 19%) Beta-galactosidase I / Carbohydrate degradation

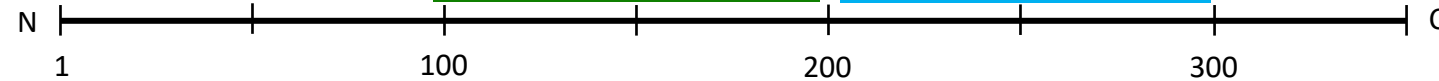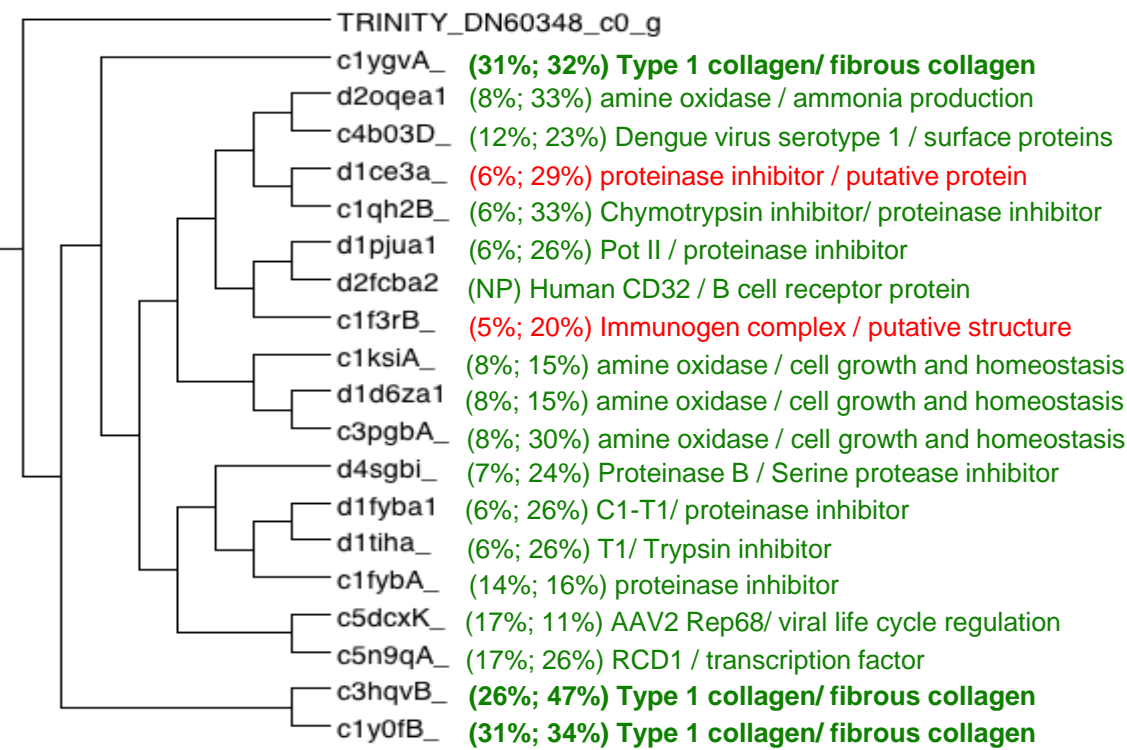

SeqID: TRINITY\_DN34715\_c0\_g1\_i1

Annotation: Adhesion G-coupled receptor B3-like

Identified by seq analysis: N

**Key:** (X%; Y%) A / B X = Alignment coverage Y = %ID between query and temple A = Molecule name B = Molecule description  
NP= Alignment & %ID not provided by Phyre2; Green = same clade; Purple = Earlier common ancestor; Red = Non-valid entry; Blue = Not in tree

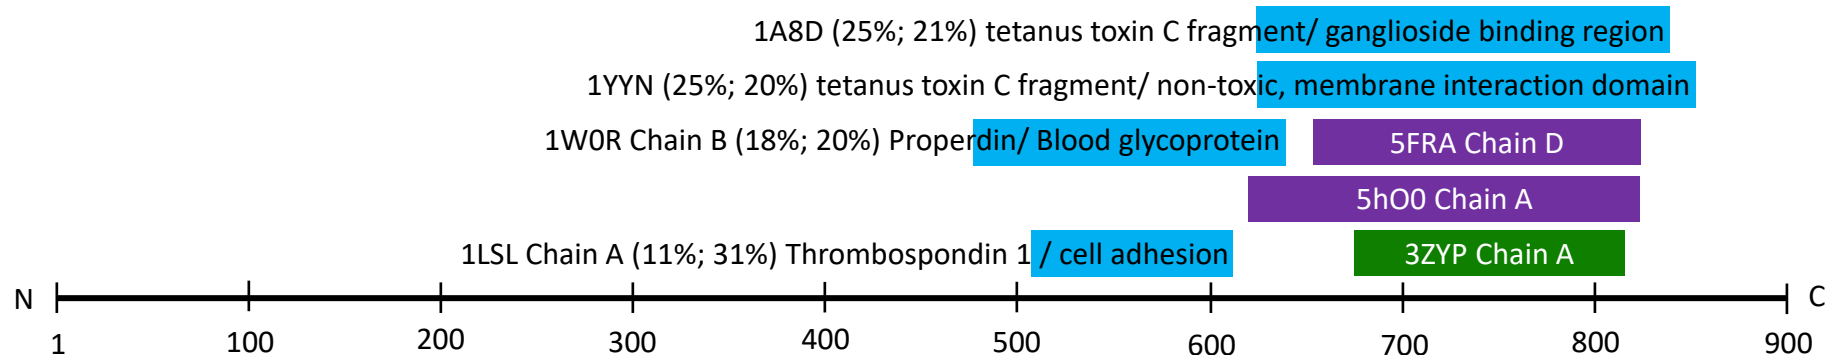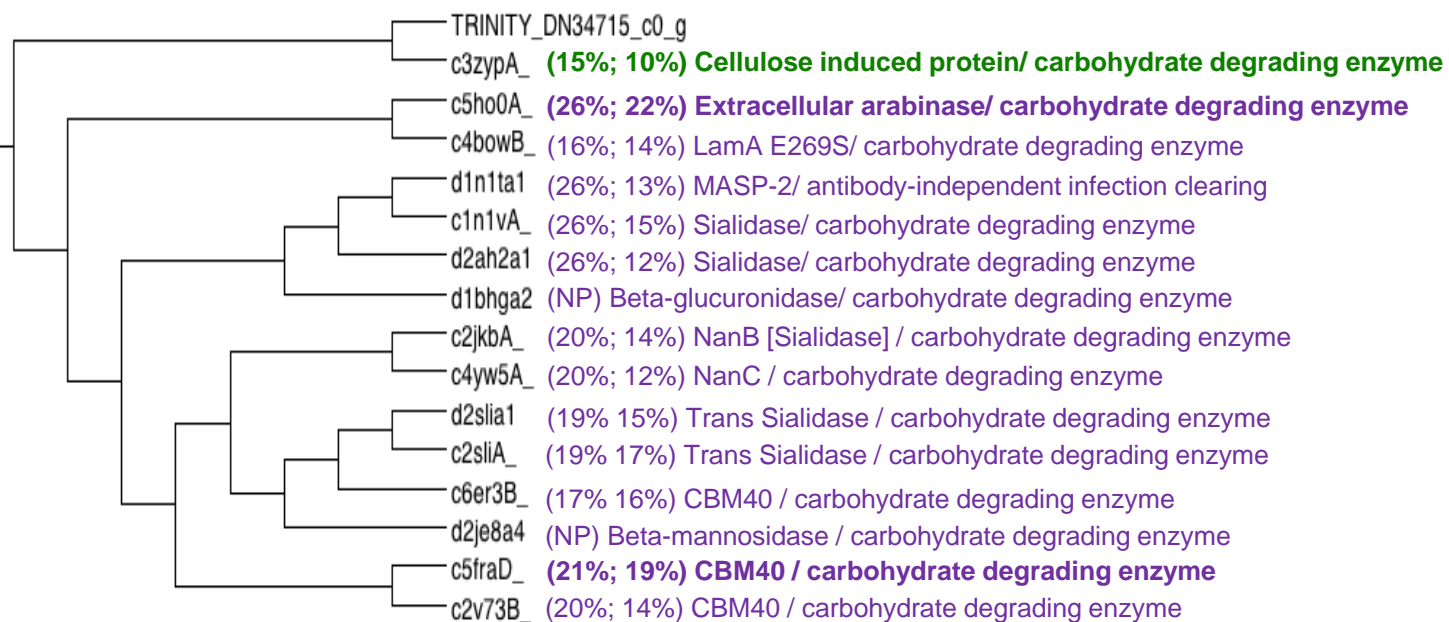

SeqID: TRINITY\_DN6224\_c0\_g2\_i1

Annotation: nematoblast-specific nb012a

Identified by seq analysis: Y

**Key:** (X%; Y%) A / B X = Alignment coverage Y= %ID between query and temple A = Molecule name B = Molecule description  
NP= Alignment & %ID not provided by Phyre2; Yellow = Sequence from database ; Green = same clade; Purple = Earlier common ancestor; Red = Non-valid entry; Blue = Not in tree

Ames\_2016\_comp60544\_c0\_seq1 (68%; 30%) **Alatina alata venom transcript**

1A8D Chain A (64%; 18%) Tetanus toxin C fragment / Non-toxic fragment

1FV3 Chain B (82%; 18%) Tetanus toxin / Complexed with gangliosides

1YYN Chain A (66%; 18%) Tetanus toxin

3WZ1 Chain A

4DQA Chain A

3ZYP Chain A

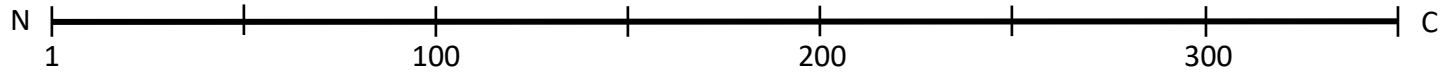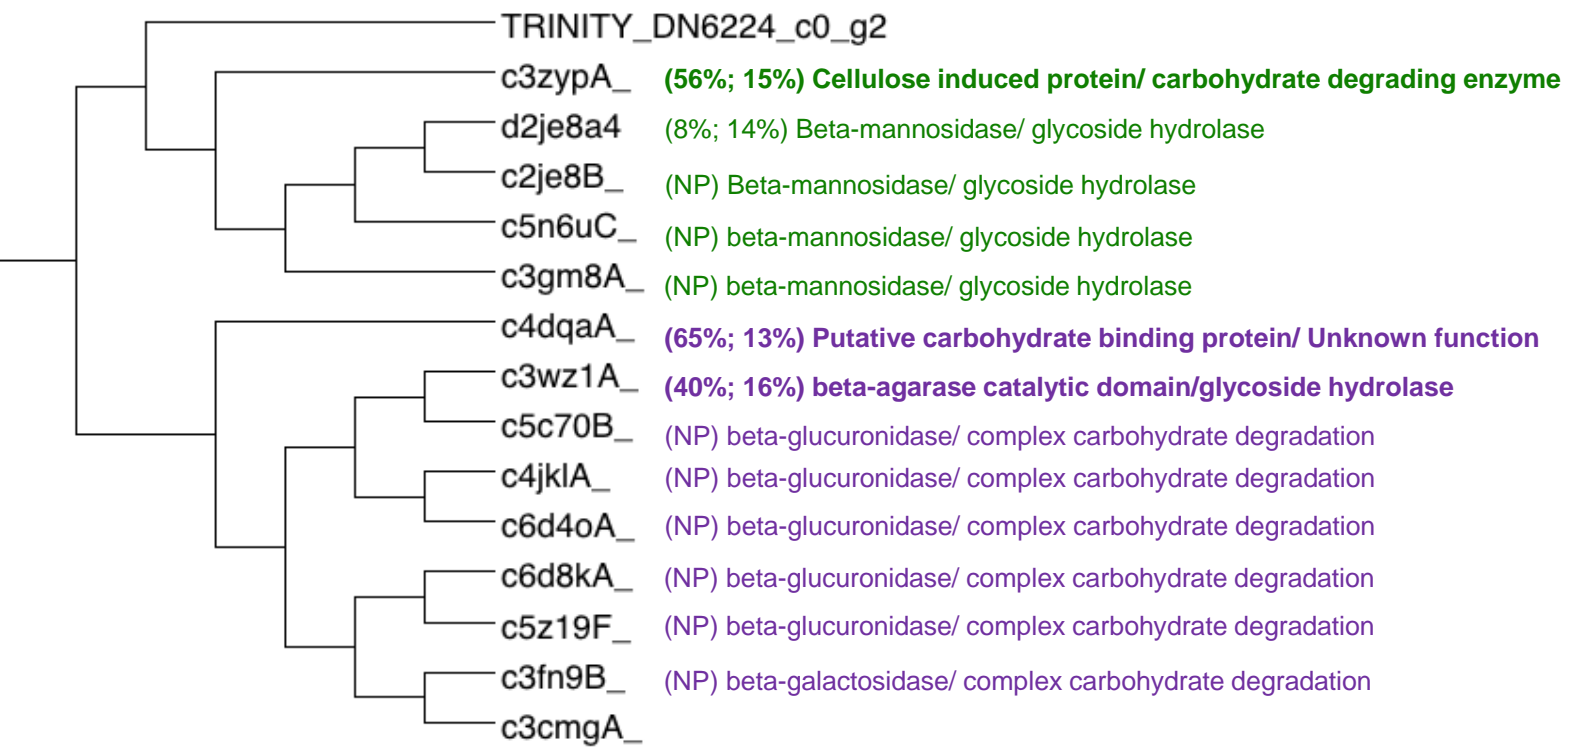



SeqID: TRINITY\_DN782\_c0\_g1\_i1

Annotation: Stefin 2

Identified by seq analysis: N

Key: (X%; Y%) A / B X = Alignment coverage Y = %ID between query and temple A = Molecule name B = Molecule description  
NP= Alignment & %ID not provided by Phyre2; Green = same clade; Purple = Earlier common ancestor; Red = Non-valid entry; Blue = Not in tree

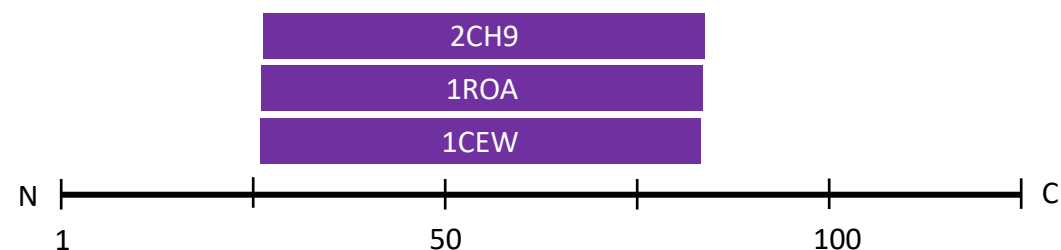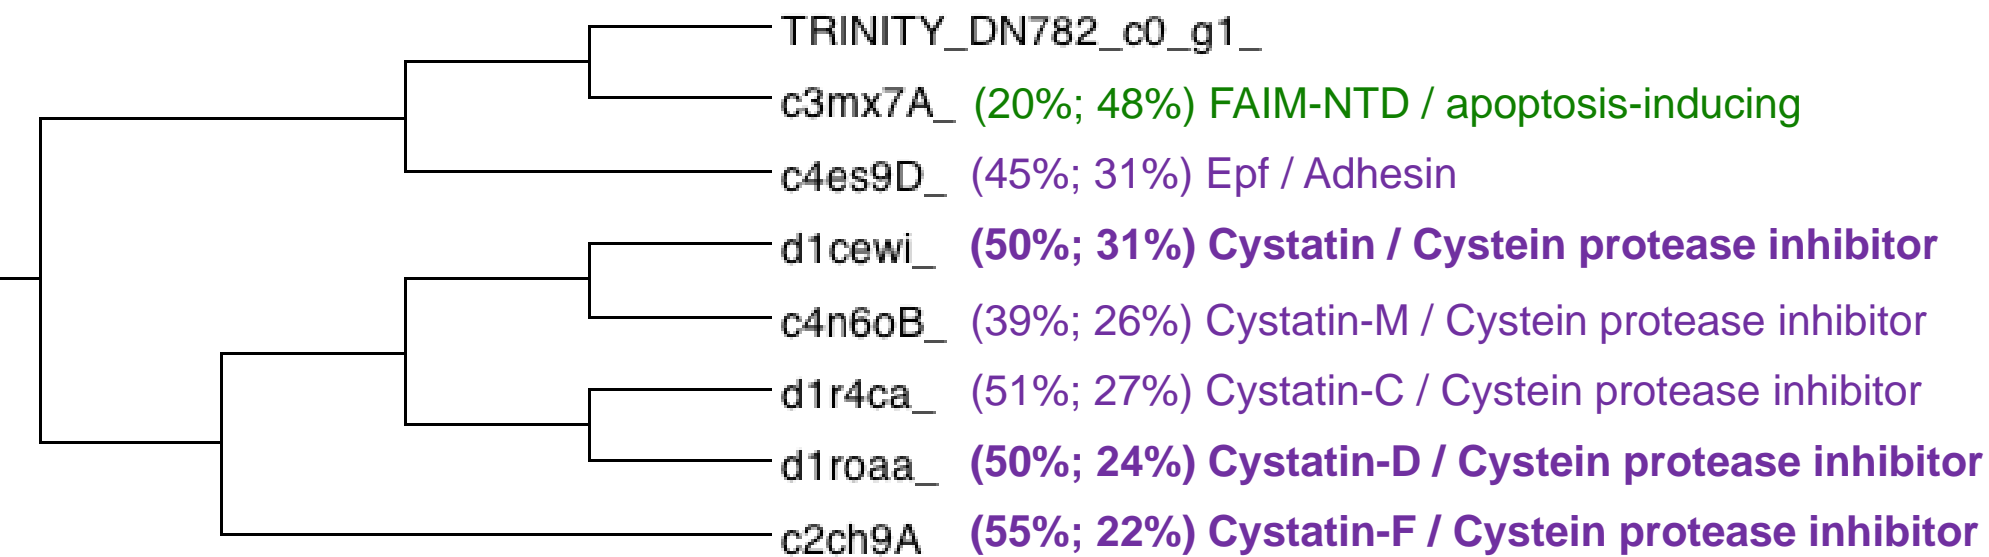

**SeqID:** TRINITY\_DN55967\_c1\_g1\_i2

**Annotation:** Peptidase inhibitor 16-like

**Identified by seq analysis:** Y

**Key:** (X%; Y%) A / B X = Alignment coverage Y = %ID between query and temple A = Molecule name B = Molecule description  
NP= Alignment & %ID not provided by Phyre2; Yellow = Sequence from database; Green = same clade; Purple = Earlier common ancestor; Red = Non-valid entry; Blue = Not in tree

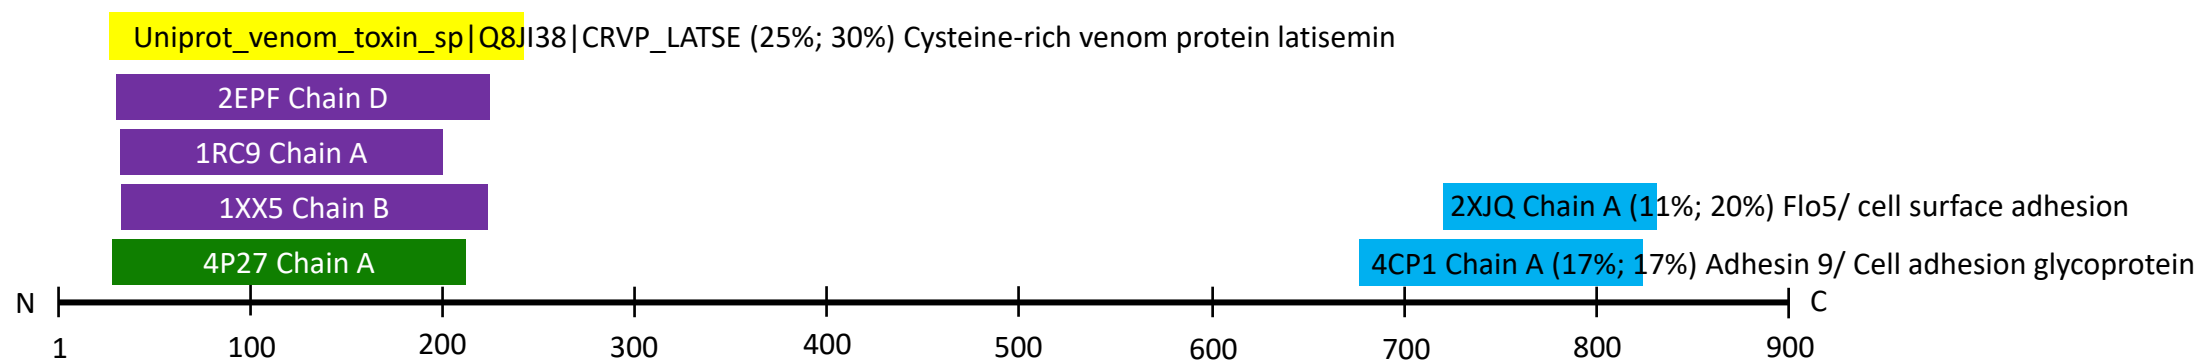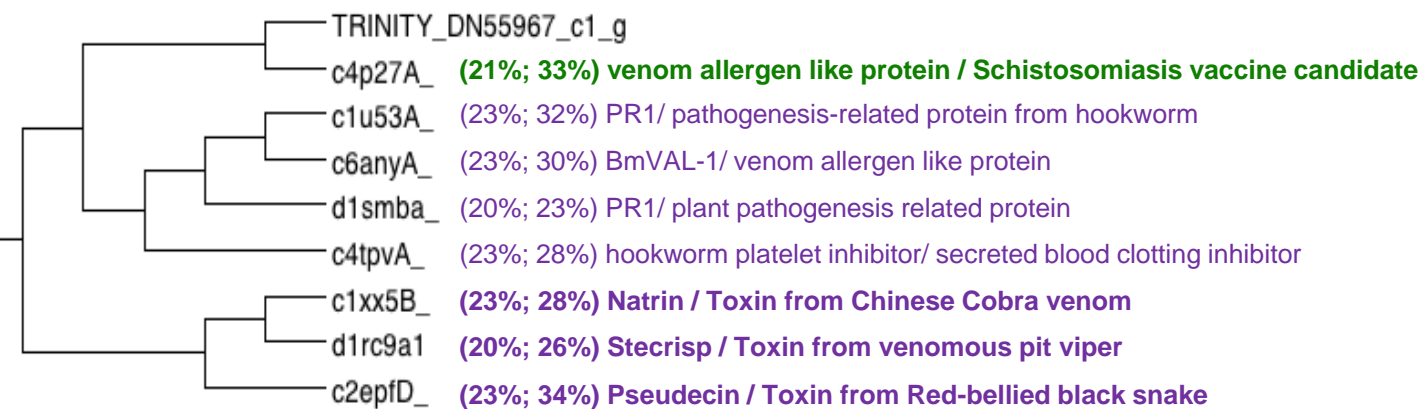

**SeqID:** TRINITY\_DN47165\_c0\_g1\_i4

**Annotation:** PC3-like endoprotease variant B

**Identified by seq analysis:** N

**Key:** (X%; Y%) A / B    X = Alignment coverage    Y = %ID between query and temple    A = Molecule name    B = Molecule description  
NP= Alignment & %ID not provided by Phyre2; Green = same clade; Purple = Earlier common ancestor; Red = Non-valid entry; Blue = Not in tree

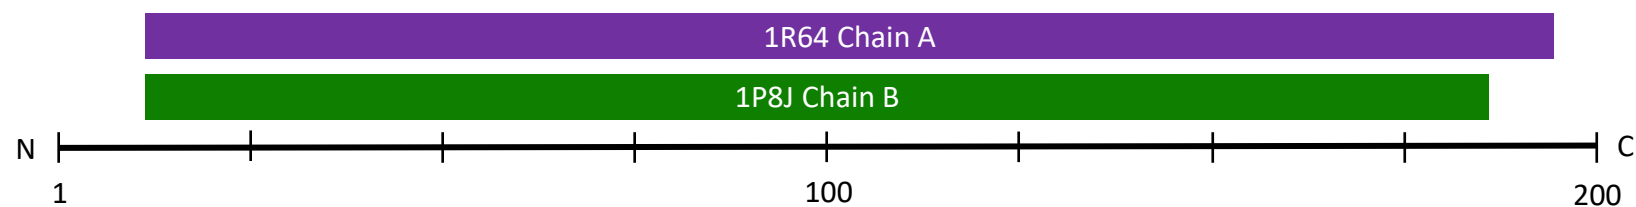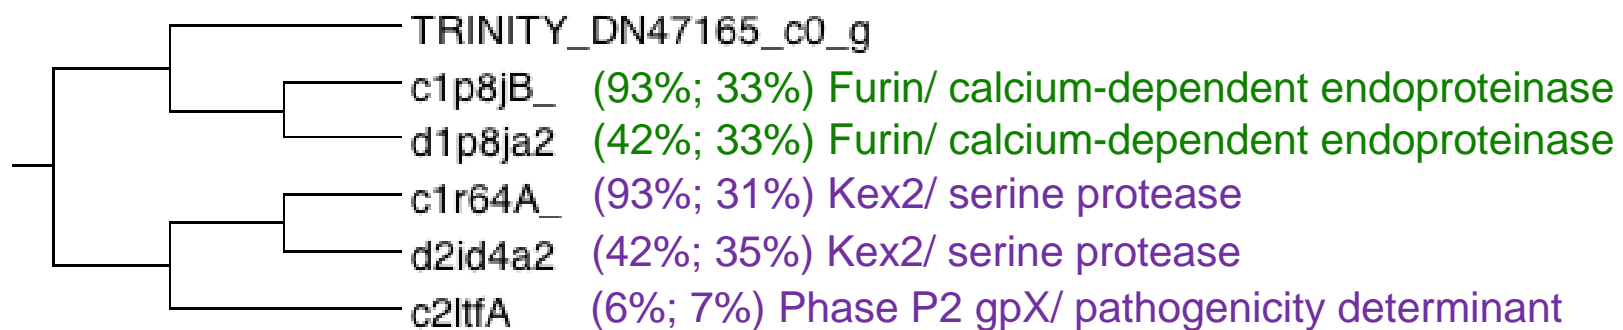

SeqID: TRINITY\_DN48395\_c1\_g1\_i1

Annotation: prostatic acid phosphatase isoform X2

Identified by seq analysis: Y

**Key:** (X%; Y%) A / B X = Alignment coverage Y = %ID between query and temple A = Molecule name B = Molecule description  
NP= Alignment & %ID not provided by Phyre2; Yellow = Sequence from database; Green = same clade; Purple = Earlier common ancestor; Red = Non-valid entry; Blue = Not in tree

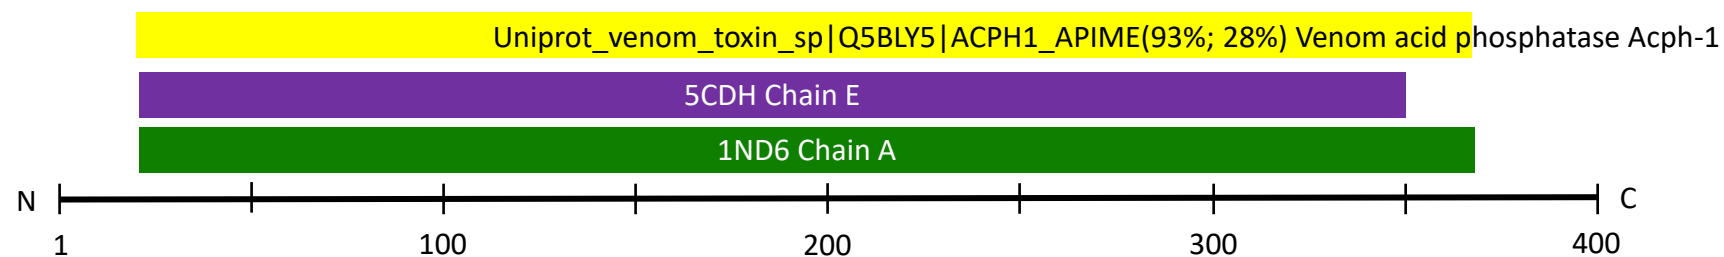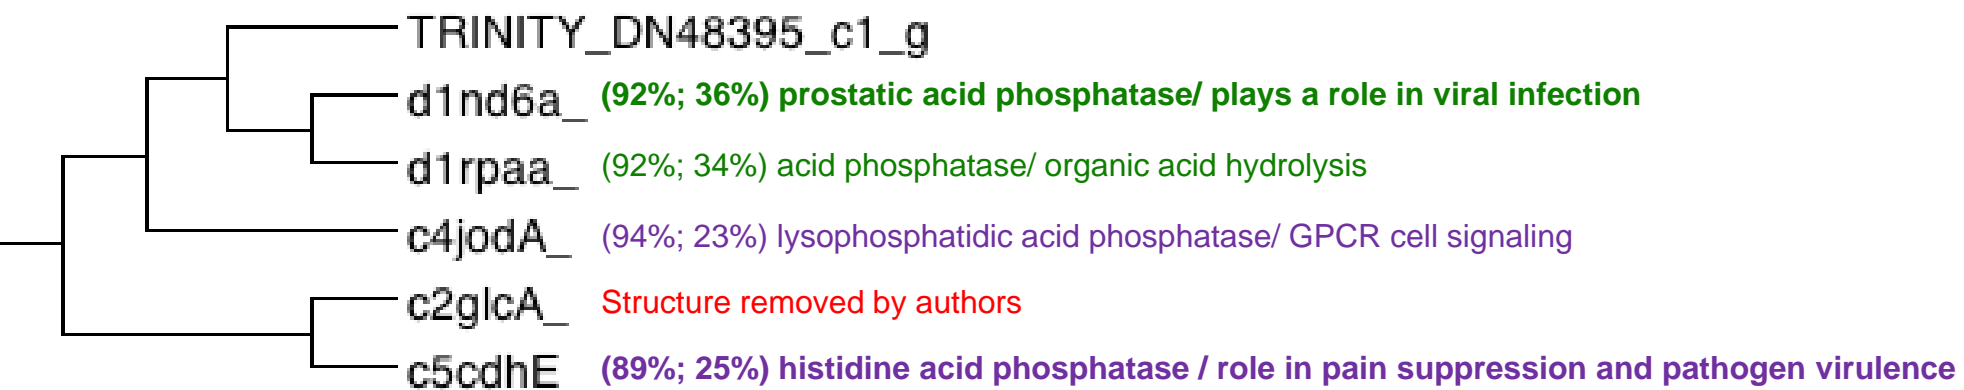

SeqID: TRINITY\_DN47165\_c0\_g1\_i5

Annotation: PC3-like endoprotease variant B

Identified by seq analysis: N

**Key:** (X%; Y%) A / B    X = Alignment coverage    Y = %ID between query and temple    A = Molecule name    B = Molecule description  
NP= Alignment & %ID not provided by Phyre2; Green = same clade; Purple = Earlier common ancestor; Red = Non-valid entry; Blue = Not in tree

1SCJ Chain B (17%; 14%) Subtilisin propeptide/ protease for subtilisin maturation

1KN6 Chain A (17%; 15%) Convertase 1 Pro-domain/ Protease, insulin processing

1R64 Chain A

2ID4 Chain A

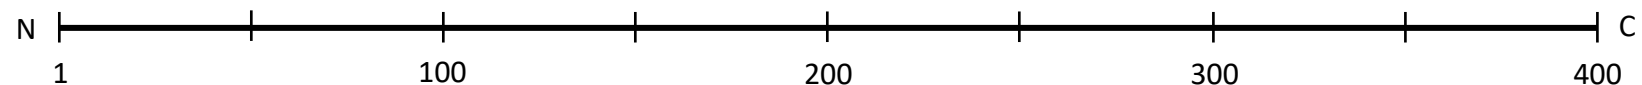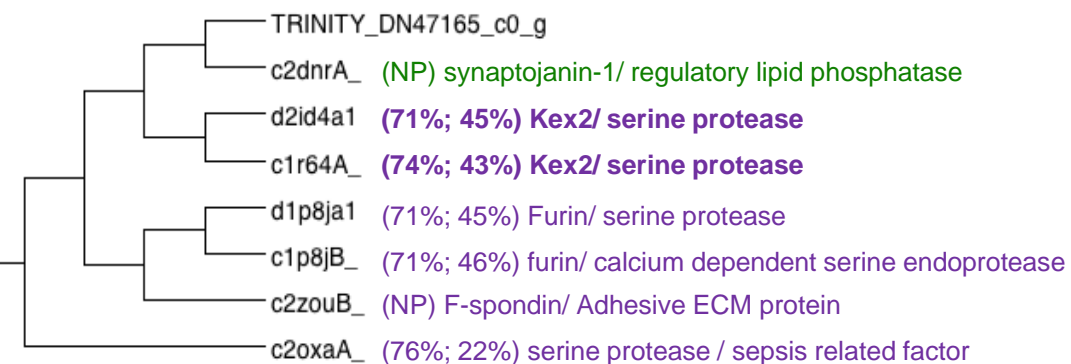

SeqID: TRINITY\_DN57920\_c0\_g1\_i1

Annotation: Carboxypeptidase N catalytic chain

Identified by seq analysis: Y

**Key:** (X%; Y%) A / B    X = Alignment coverage    Y= %ID between query and temple    A = Molecule name    B = Molecule description  
NP= Alignment & %ID not provided by Phyre2; Yellow = Sequence from database; Green = same clade; Purple = Earlier common ancestor; Red = Non-valid entry; Blue = Not in tree

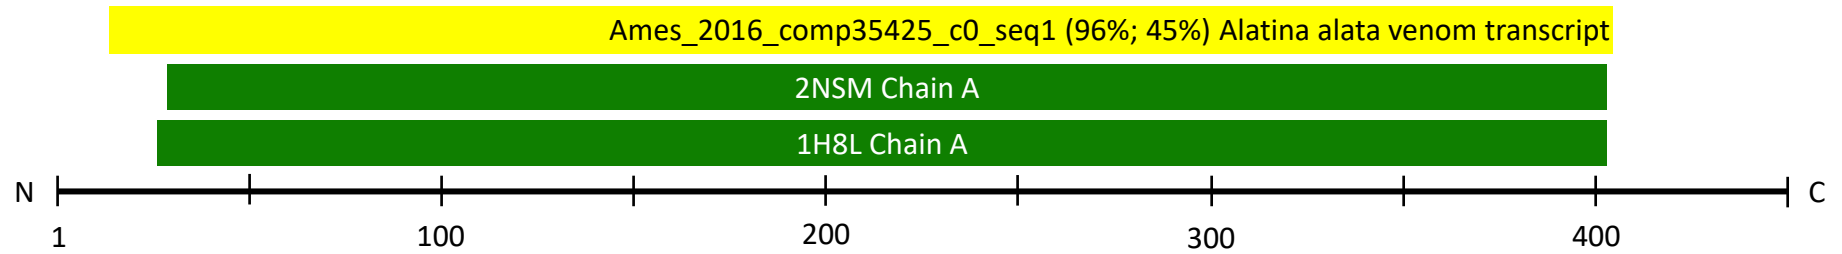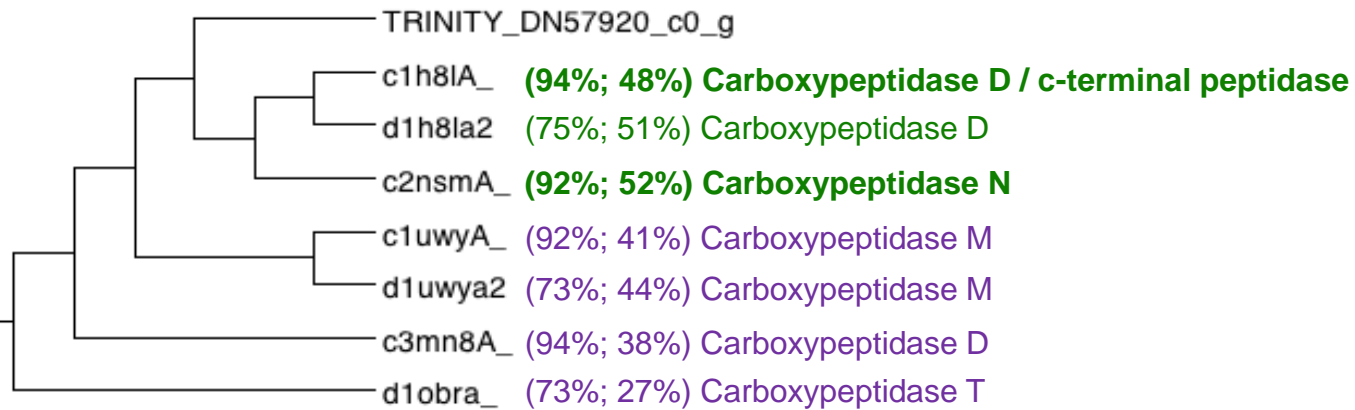

SeqID: TRINITY\_DN54320\_c0\_g1\_i1  
 Annotation: Carboxypeptidase\_D  
 Identified by seq analysis: Y

**Key:** (X%; Y%) A / B X = Alignment coverage Y= %ID between query and temple A = Molecule name B = Molecule description  
 NP= Alignment & %ID not provided by Phyre2; Yellow = Sequence from database; Green = same clade; Purple = Earlier common ancestor; Red = Non-valid entry; Blue = Not in tree

Brinkman\_2012\_156400736 (51%; 50%) Chironex fleckeri venom protein

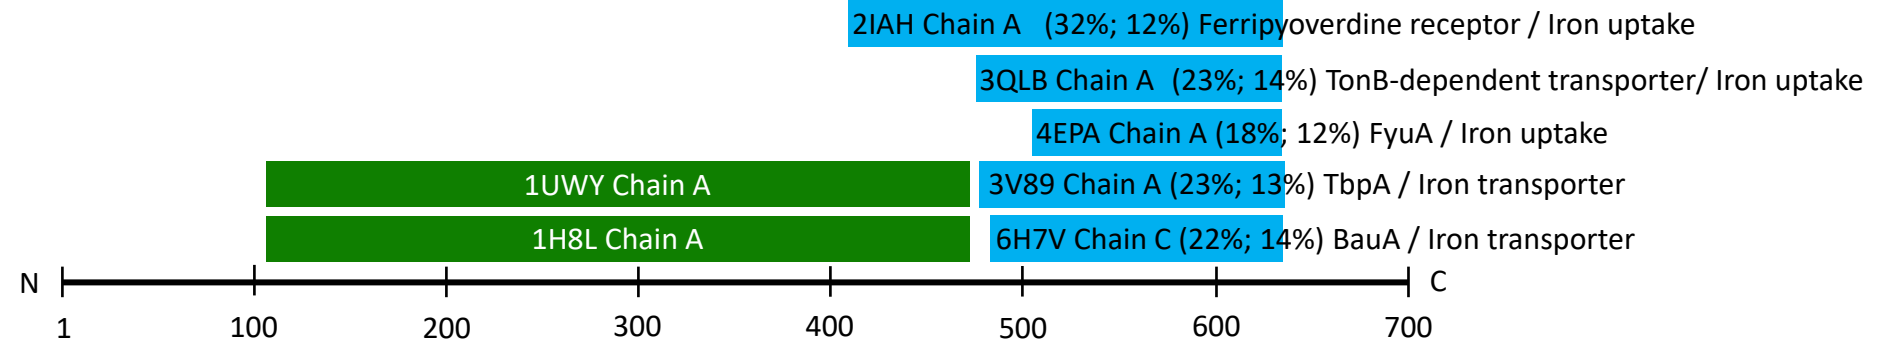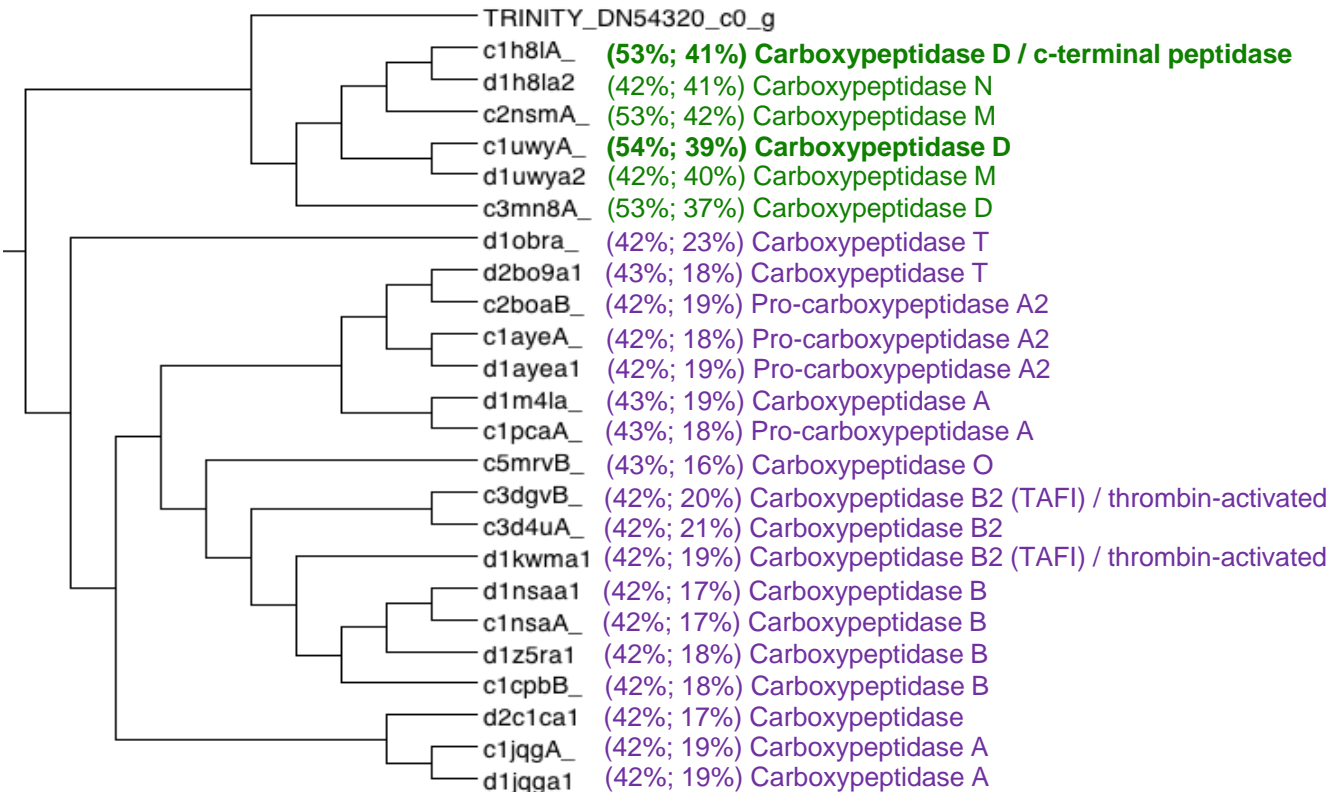

**SeqID:** TRINITY\_DN40435\_c0\_g1\_i1

**Annotation:** endoplasmic reticulum aminopeptidase 1-like

**Identified by seq analysis:** Y

**Key:** (X%; Y%) A / B    X = Alignment coverage    Y= %ID between query and temple    A = Molecule name    B = Molecule description  
NP= Alignment & %ID not provided by Phyre2; Yellow = Sequence from database; Green = same clade; Purple = Earlier common ancestor; Red = Non-valid entry; Blue = Not in tree

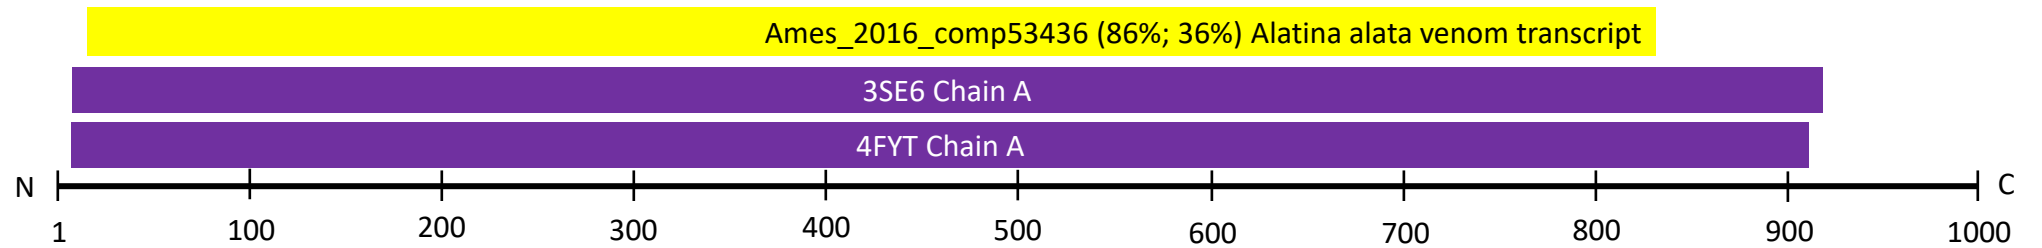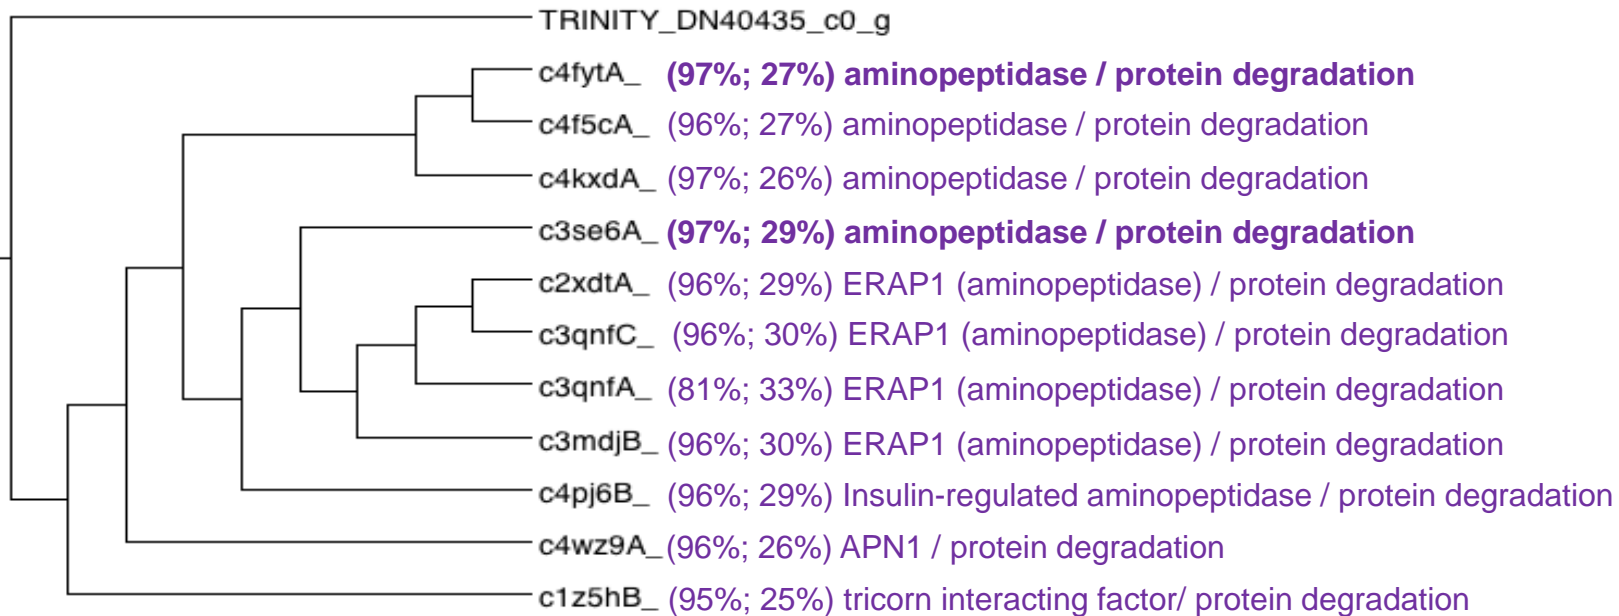



SeqID: TRINITY\_DN21210\_c1\_g1\_i1

Annotation: PC3-like endoprotease variant B

Identified by seq analysis: N

**Key:** (X%; Y%) A / B    X = Alignment coverage    Y = %ID between query and temple    A = Molecule name    B = Molecule description  
NP= Alignment & %ID not provided by Phyre2; Green = same clade; Purple = Earlier common ancestor; Red = Non-valid entry; Blue = Not in tree

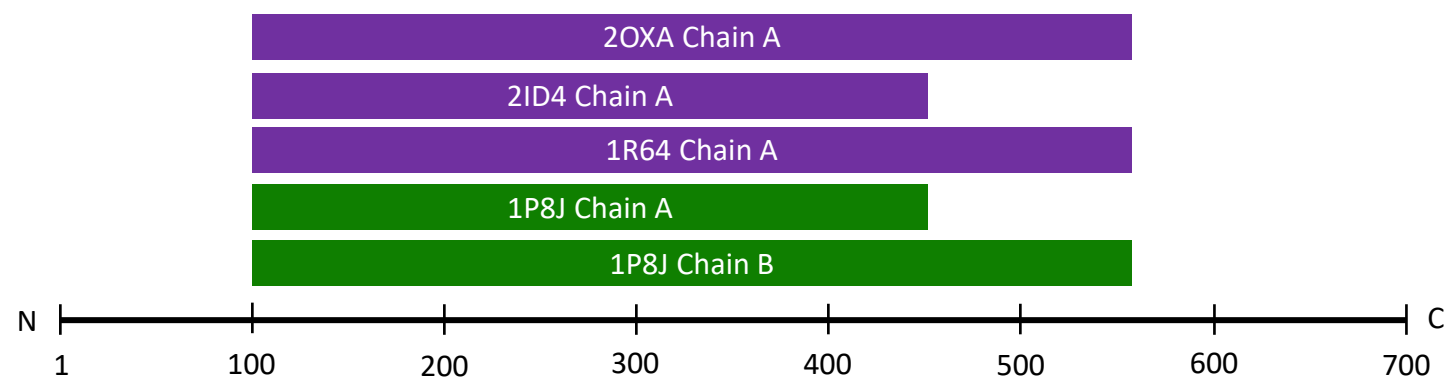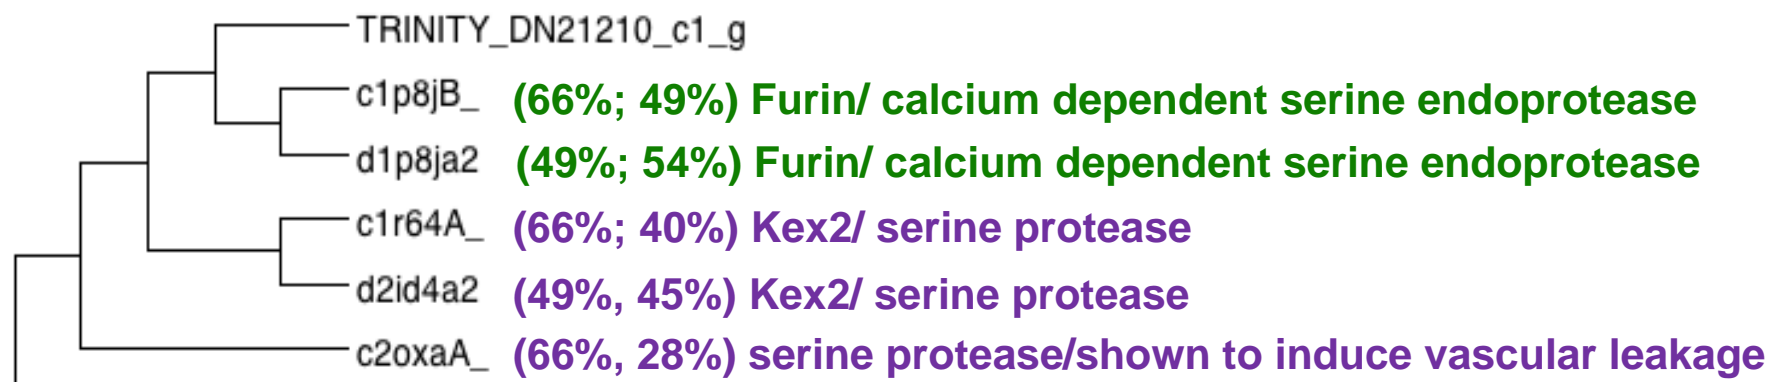

**SeqID:** TRINITY\_DN60273\_c8\_g1\_i1

**Annotation:** peptidyl-prolyl cis-trans isomerase A

**Identified by seq analysis:** Y

**Key:** (X%; Y%) A / B    X = Alignment coverage    Y= %ID between query and temple    A = Molecule name    B = Molecule description  
NP= Alignment & %ID not provided by Phyre2; Yellow = Sequence from database; Green = same clade; Purple = Earlier common ancestor; Red = Non-valid entry; Blue = Not in tree

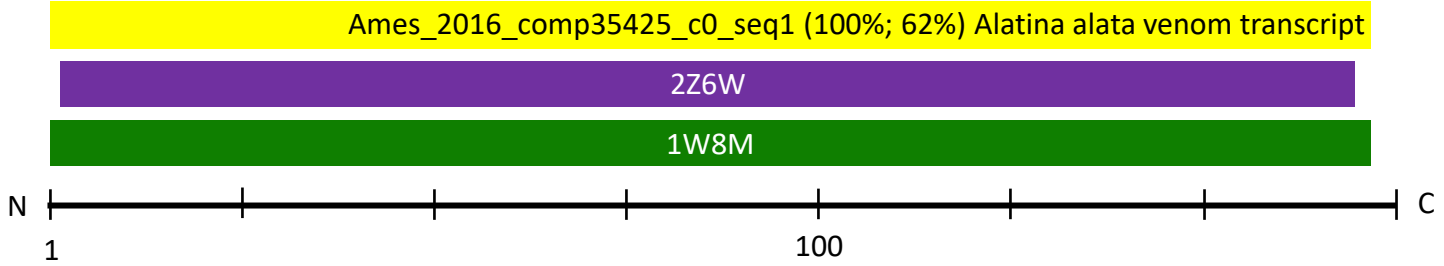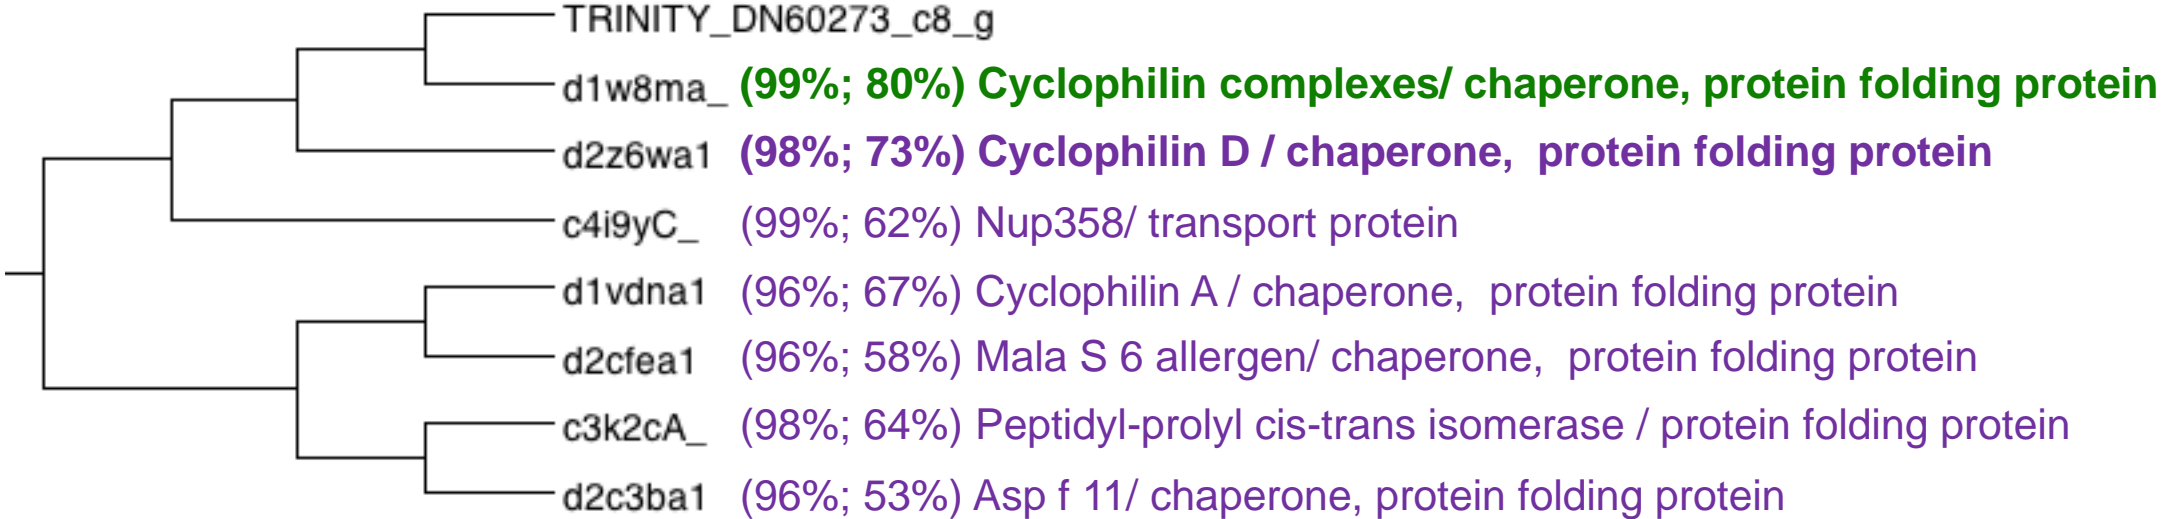

**SeqID:** TRINITY\_DN6523\_c1\_g1\_i1  
**Annotation:** disulfide-isomerase A3  
**Identified by seq analysis:** Y

**Key:** (X%; Y%) A / B    X = Alignment coverage    Y= %ID between query and temple    A = Molecule name    B = Molecule description  
NP= Alignment & %ID not provided by Phyre2; Yellow = Sequence from database; Green = same clade; Purple = Earlier common ancestor; Red = Non-valid entry; Blue = Not in tree

Ames\_2016\_comp57297\_c0\_seq1 (85%; 34%) **Alatina alata venom transcript**

**2B5E Chain A (91%;28%) Disulfide isomerase/ secretory protein folding**

**3P2A Chain B (85%; 18%) Thioredoxin 2/ oxidoreductase**

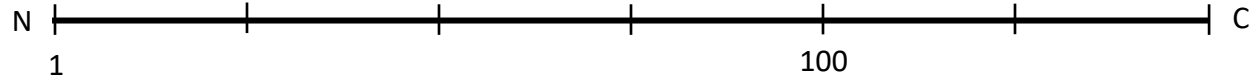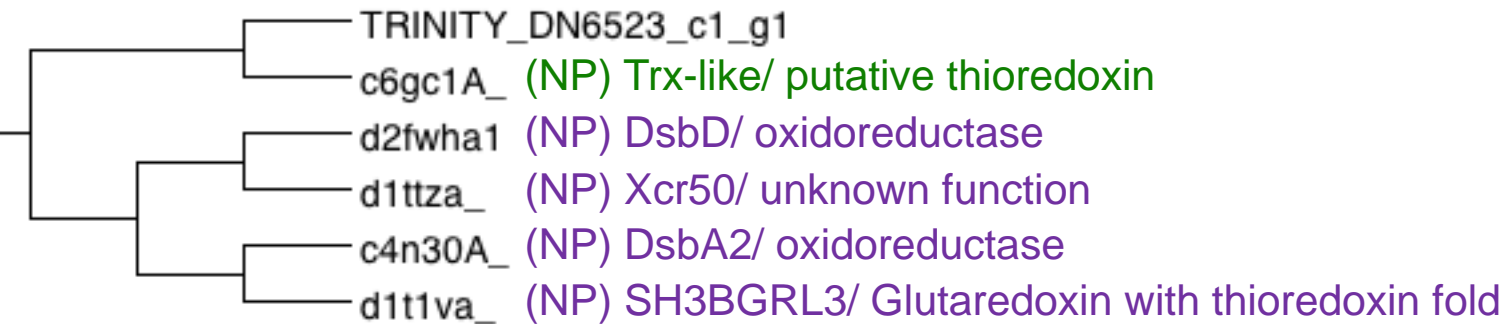

SeqID: TRINITY\_DN58421\_c12\_g1\_i1

Annotation: NA

Identified by seq analysis: N

**Key:** (X%; Y%) A / B    X = Alignment coverage    Y = %ID between query and temple    A = Molecule name    B = Molecule description  
NP= Alignment & %ID not provided by Phyre2; Green = same clade; Purple = Earlier common ancestor; Red = Non-valid entry; Blue = Not in tree

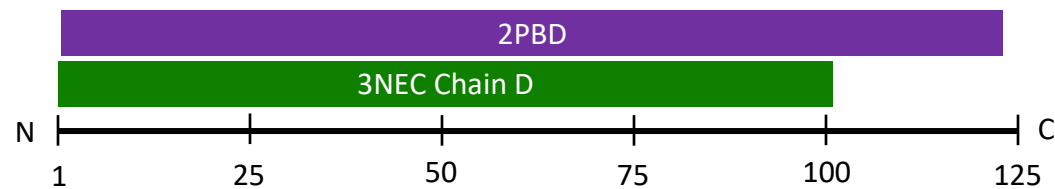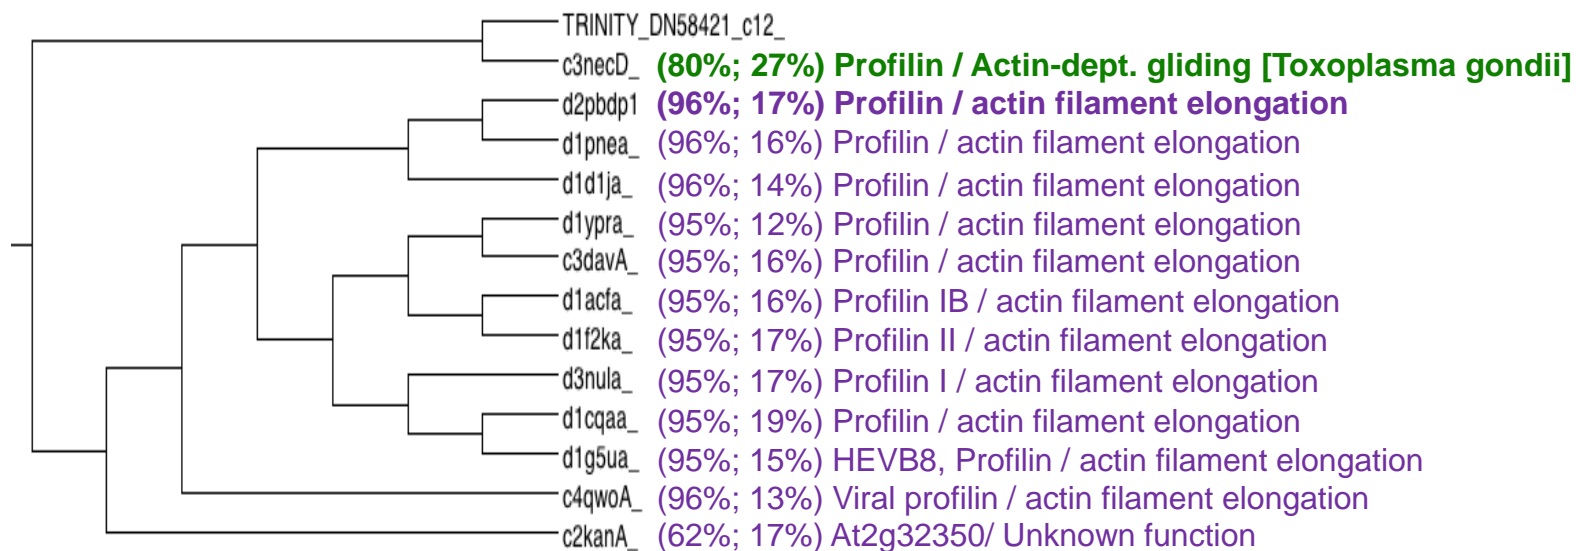

SeqID: TRINITY\_DN10998\_c2\_g1\_i1

Annotation: NA

Identified by seq analysis: N

Key: (X%; Y%) A / B X = Alignment coverage Y = %ID between query and temple A = Molecule name B = Molecule description  
NP= Alignment & %ID not provided by Phyre2; Green = same clade; Purple = Earlier common ancestor; Red = Non-valid entry; Blue = Not in tree

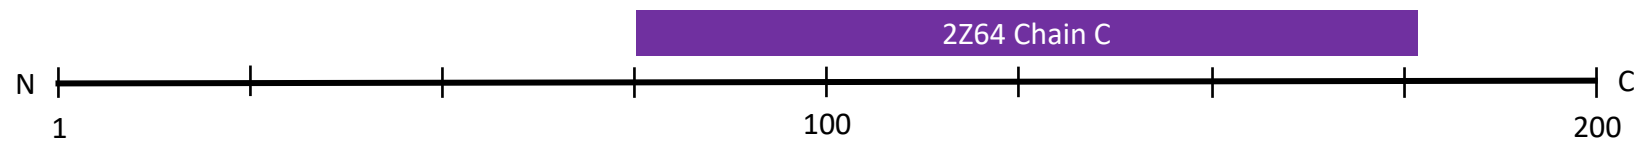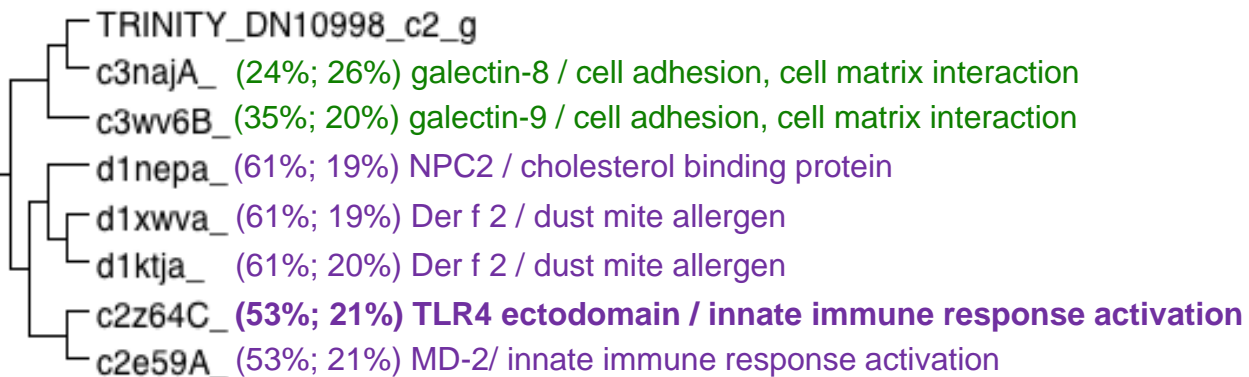

SeqID: TRINITY\_DN57718\_c2\_g1\_i1

Annotation: TKL Kinase

Identified by seq analysis: N

Key: (X%; Y%) A / B X = Alignment coverage Y = %ID between query and temple A = Molecule name B = Molecule description  
NP= Alignment & %ID not provided by Phyre2; Green = same clade; Purple = Earlier common ancestor; Red = Non-valid entry; Blue = Not in tree

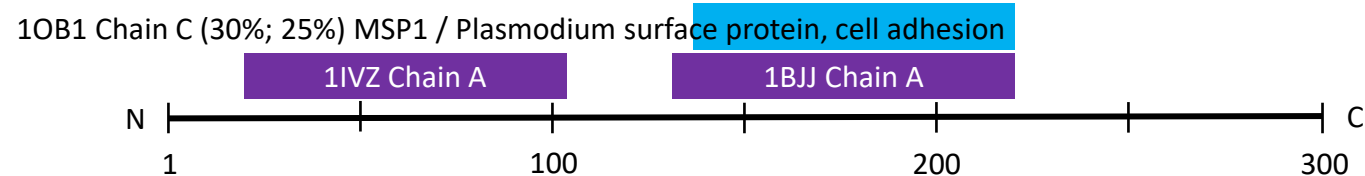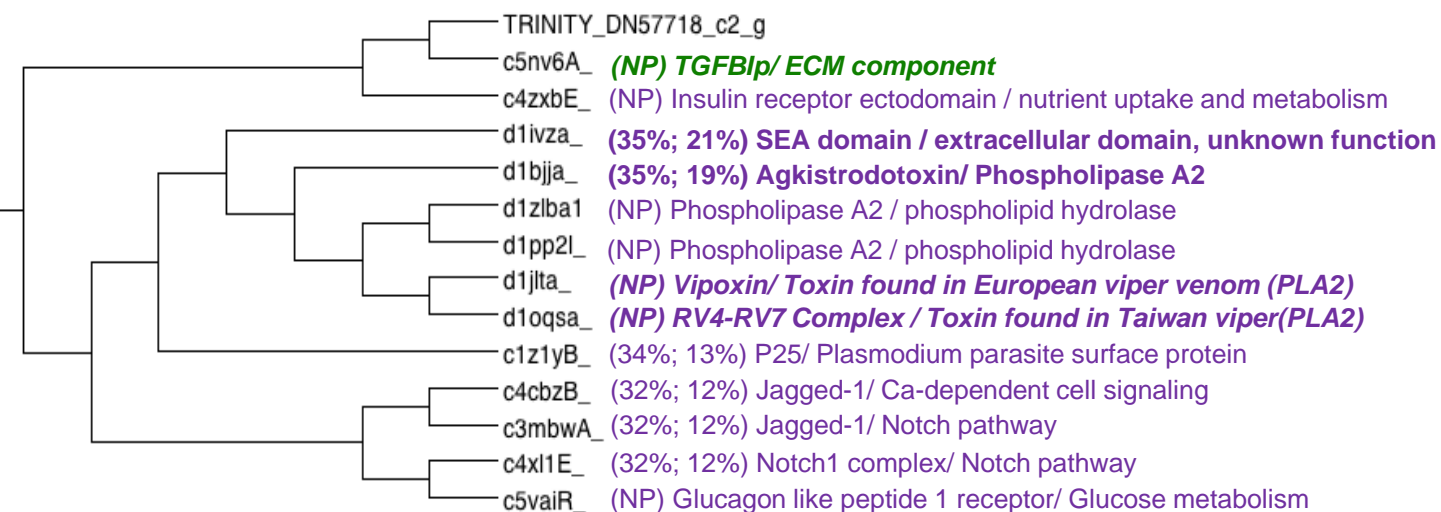

SeqID: TRINITY\_DN60360\_c0\_g1\_i1

Annotation: Nematoblast-specific nb012a

Identified by seq analysis: N

**Key:** (X%; Y%) A / B X = Alignment coverage Y = %ID between query and temple A = Molecule name B = Molecule description  
NP= Alignment & %ID not provided by Phyre2; Green = same clade; Purple = Earlier common ancestor; Red = Non-valid entry; Blue = Not in tree

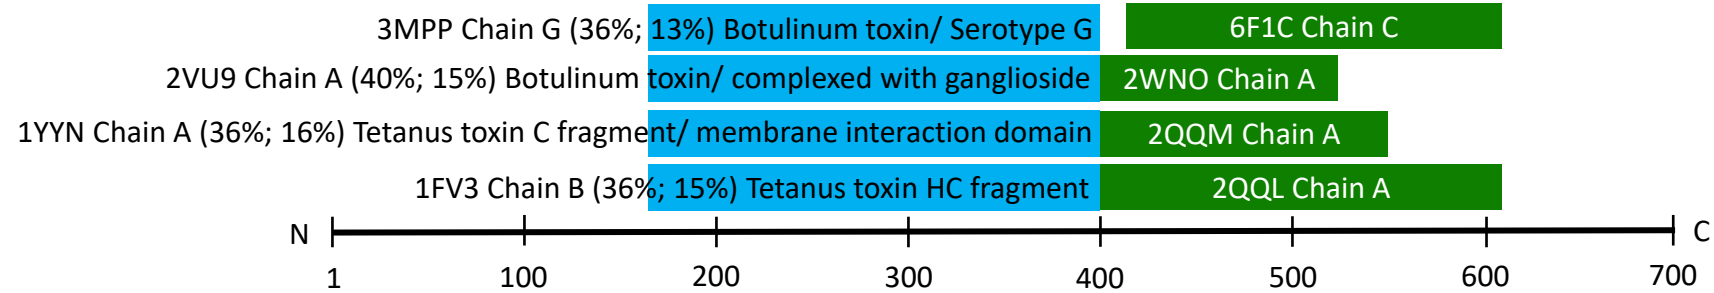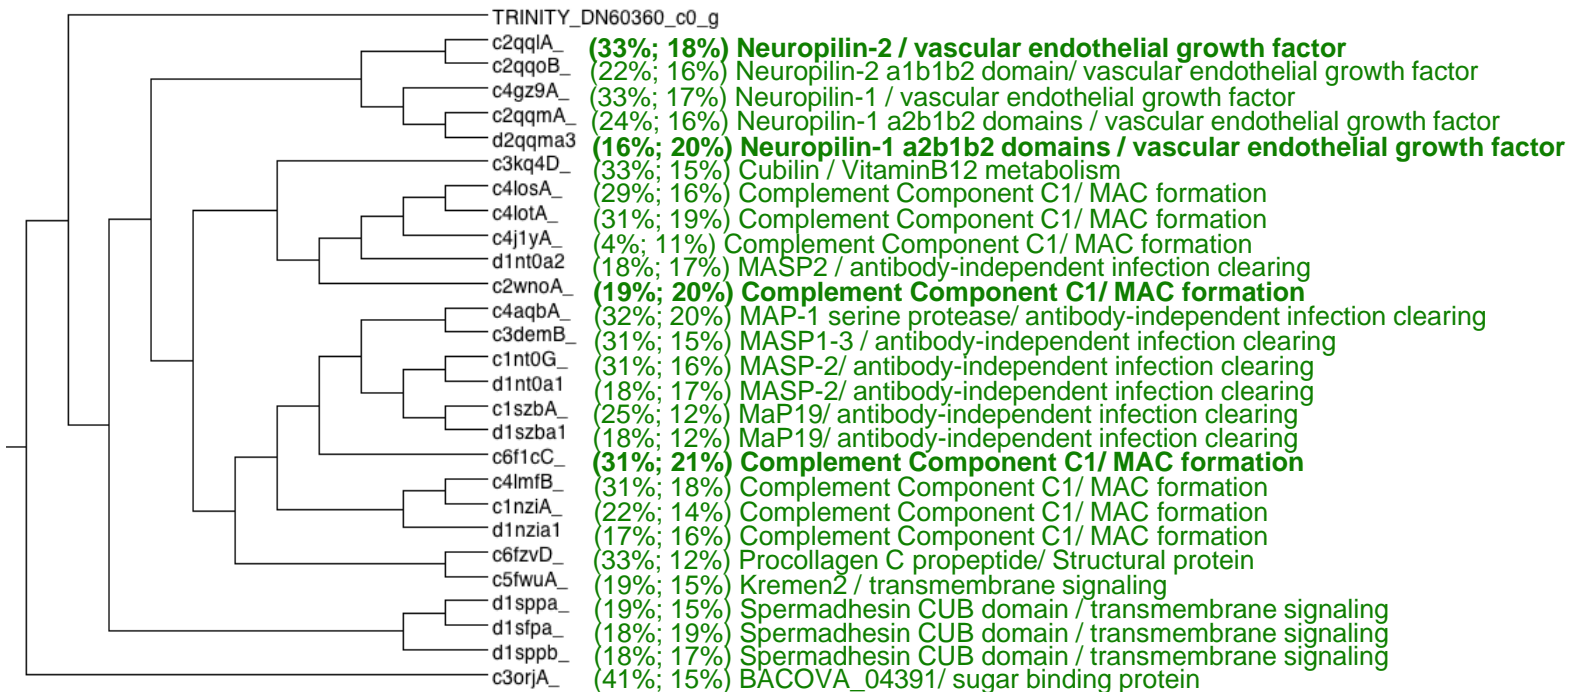

SeqID: TRINITY\_DN3120\_c1\_g1\_i1

Annotation: NA

Identified by seq analysis: N

**Key:** (X%; Y%) A / B X = Alignment coverage Y = %ID between query and temple A = Molecule name B = Molecule description  
NP= Alignment & %ID not provided by Phyre2; Green = same clade; Purple = Earlier common ancestor; Red = Non-valid entry; Blue = Not in tree

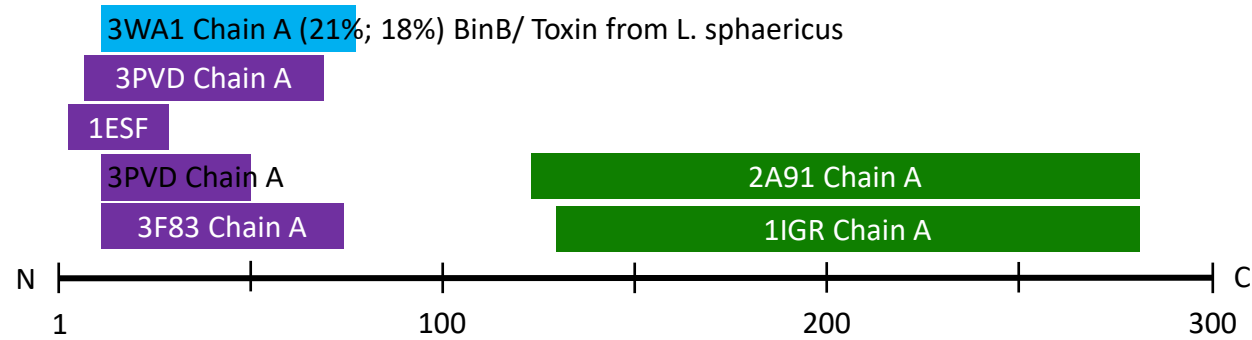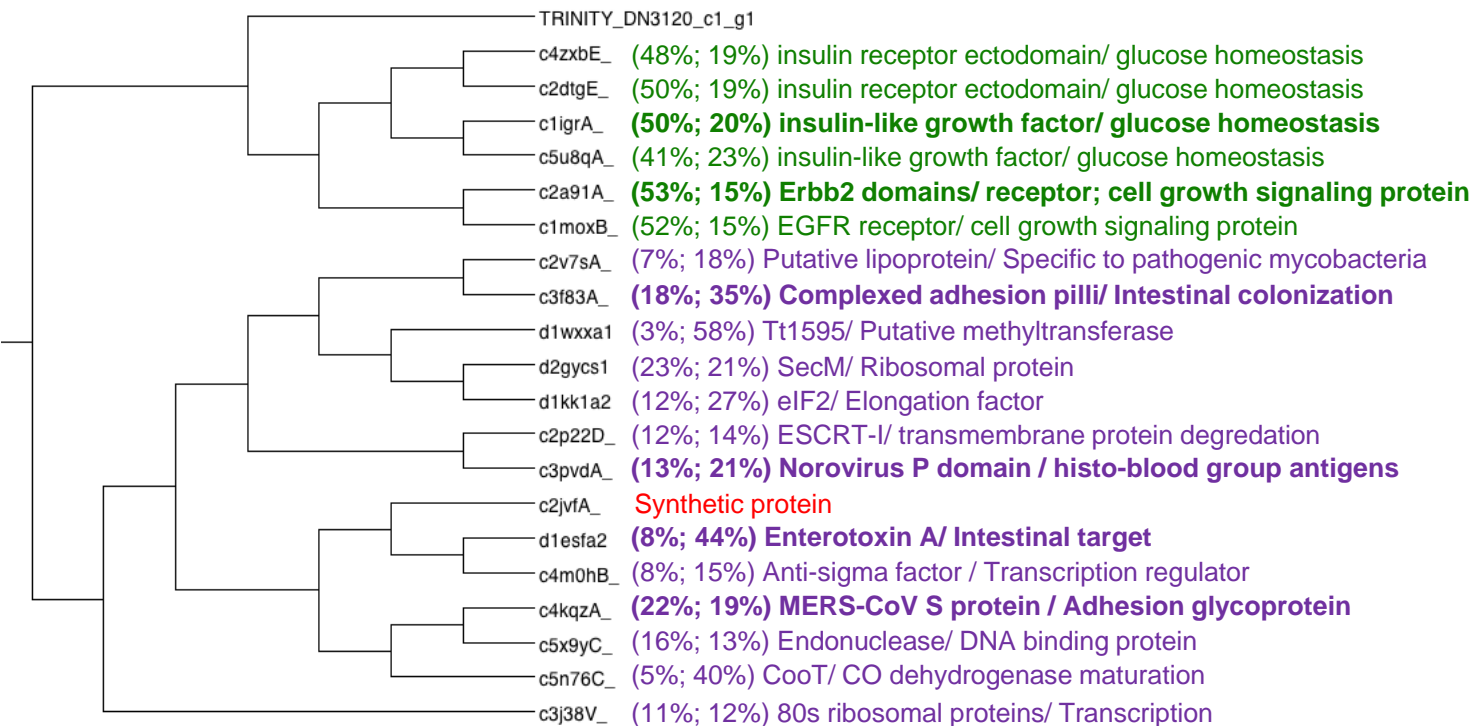



SeqID: TRINITY\_DN52005\_c0\_g3\_i2

Annotation: NA

Identified by seq analysis: N

Key: (X%; Y%) A / B X = Alignment coverage Y = %ID between query and temple A = Molecule name B = Molecule description  
NP= Alignment & %ID not provided by Phyre2; Green = same clade; Purple = Earlier common ancestor; Red = Non-valid entry; Blue = Not in tree

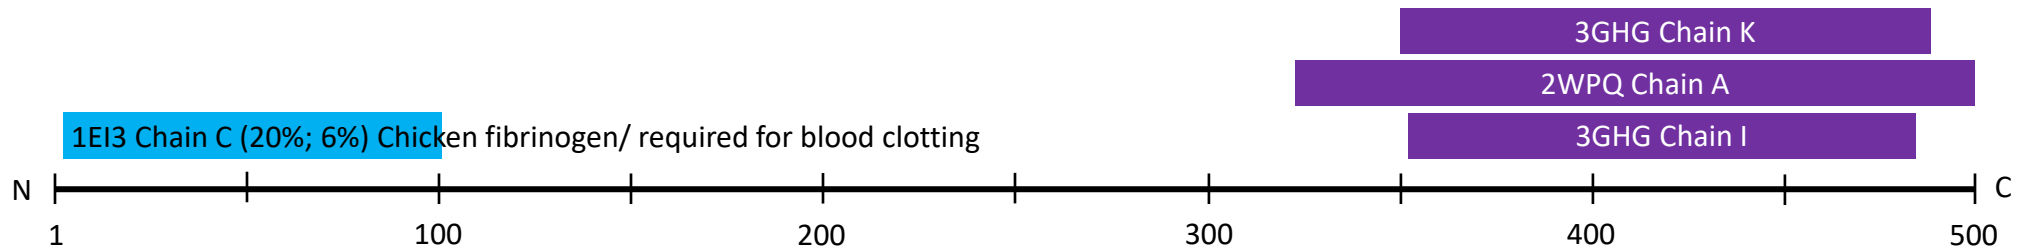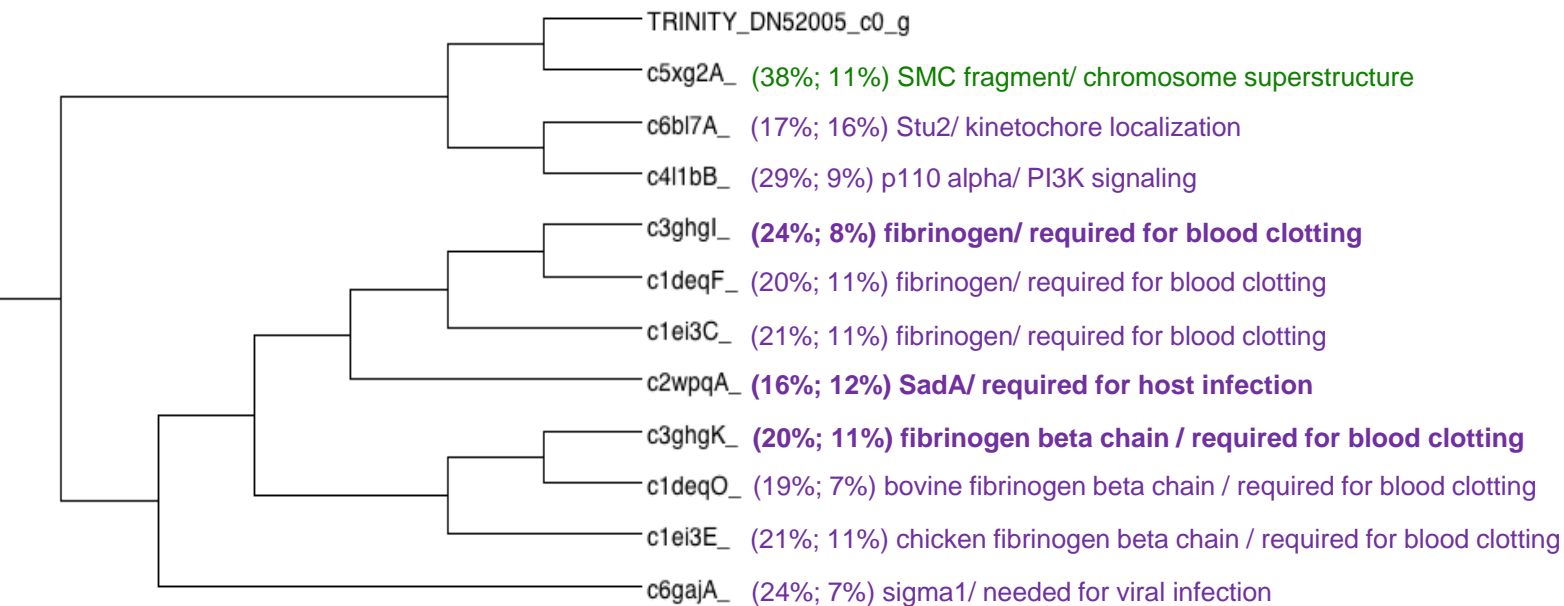

SeqID: TRINITY\_DN3183\_c1\_g2\_i1

Annotation: EGF-like repeat and discoidin I-like domain-containing 3

Identified by seq analysis: Y

**Key:** (X%; Y%) A / B    X = Alignment coverage    Y = %ID between query and temple    A = Molecule name    B = Molecule description  
NP= Alignment & %ID not provided by Phyre2; Yellow = Sequence from database; Green = same clade; Purple = Earlier common ancestor; Red = Non-valid entry; Blue = Not in tree

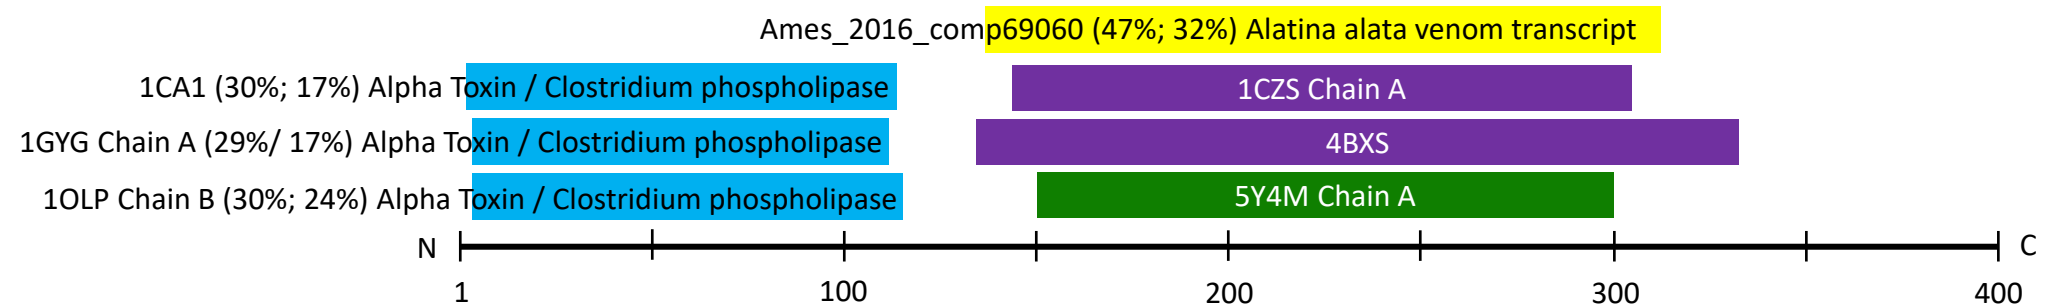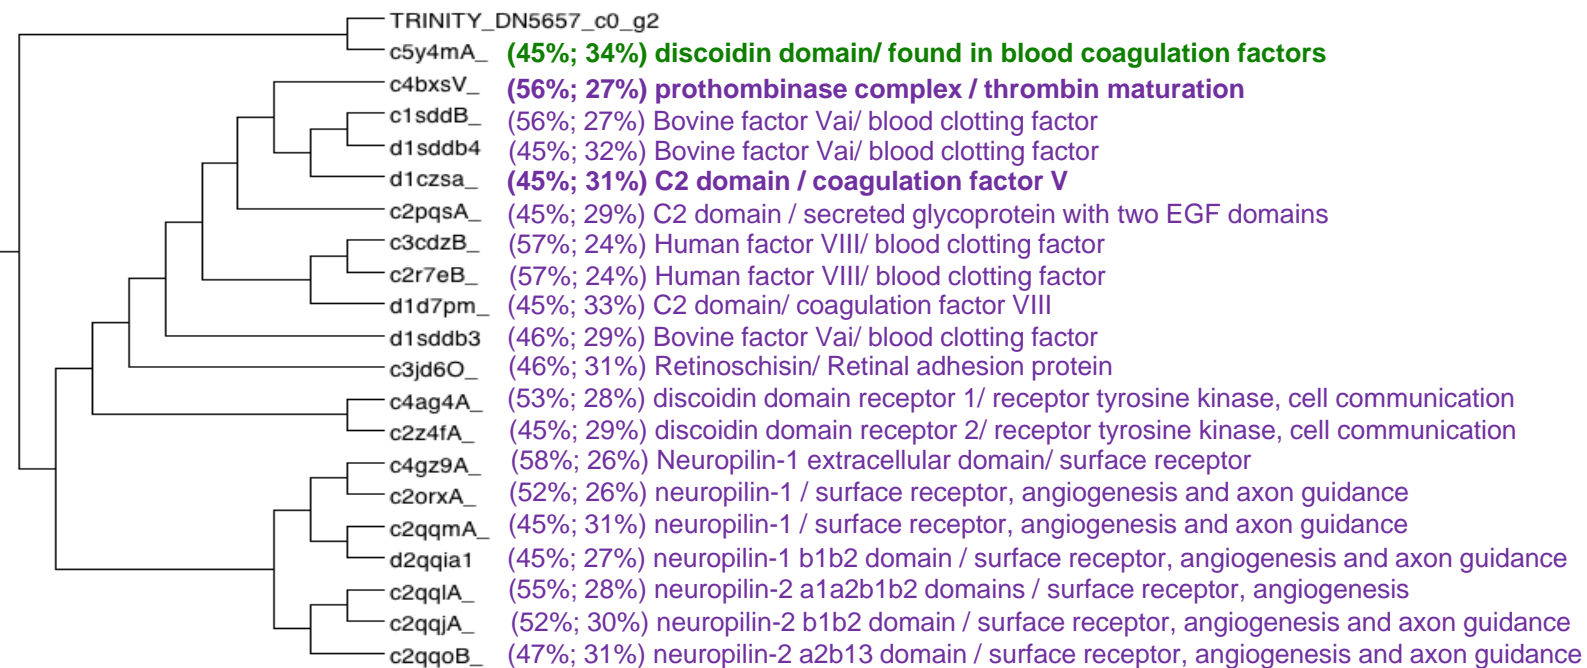

SeqID: TRINITY\_DN9426\_c0\_g1\_i2

Annotation: glutamine gamma-glutamyltransferase

Identified by seq analysis: N

**Key:** (X%; Y%) A / B    X = Alignment coverage    Y= %ID between query and temple    A = Molecule name    B = Molecule description  
NP= Alignment & %ID not provided by Phyre2; Green = same clade; Purple = Earlier common ancestor; Red = Non-valid entry; Blue = Not in tree

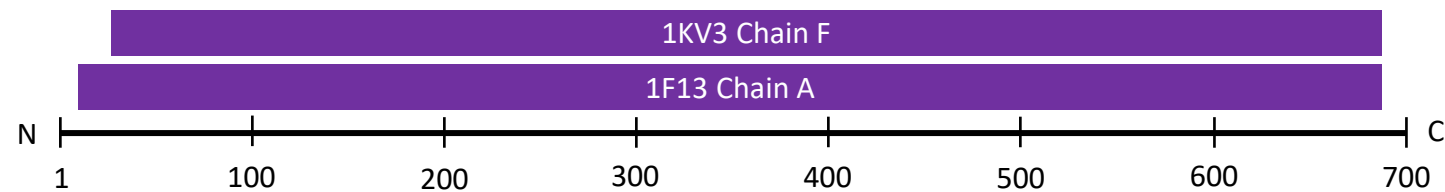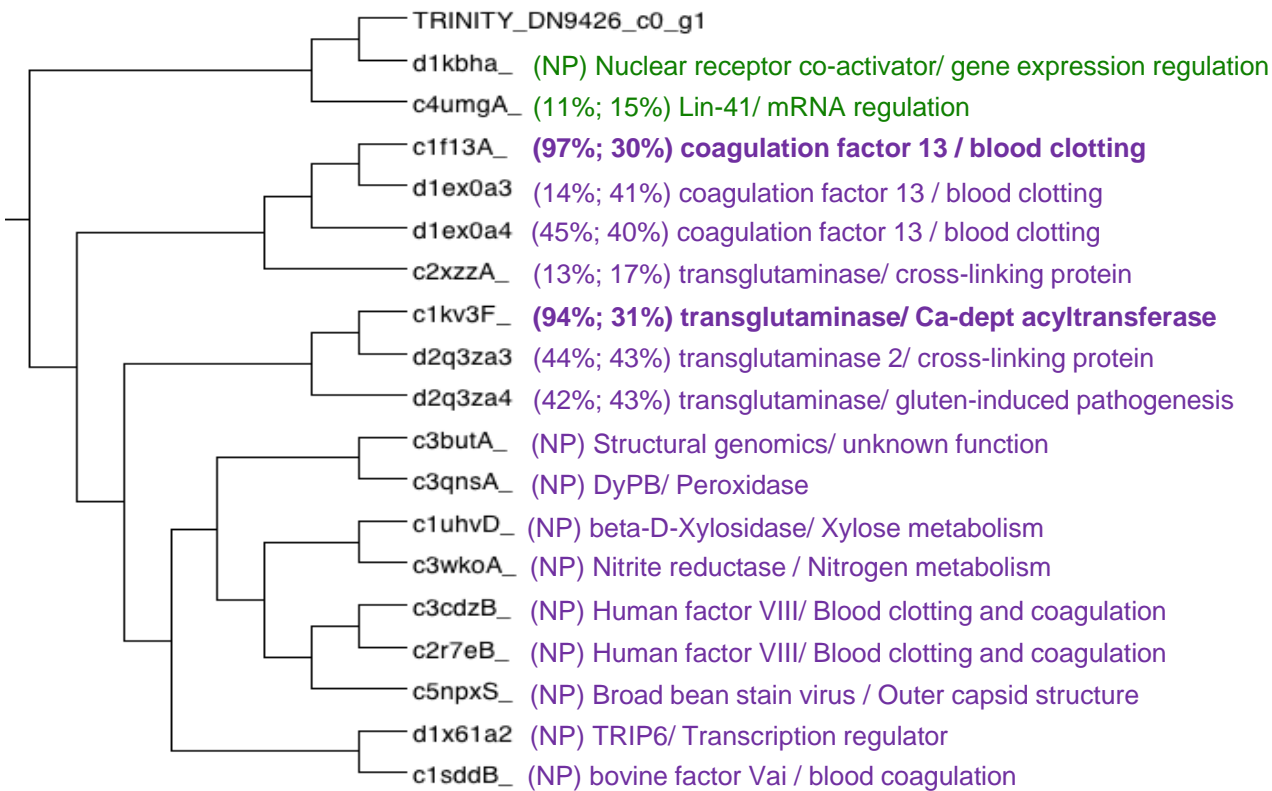

SeqID: TRINITY\_DN3183\_c0\_g2\_i1

Annotation: coagulation factor V-like

Identified by seq analysis: Y

Ames\_2016\_comp77419 (33%; 32%) **Alatina alata venom transcript**

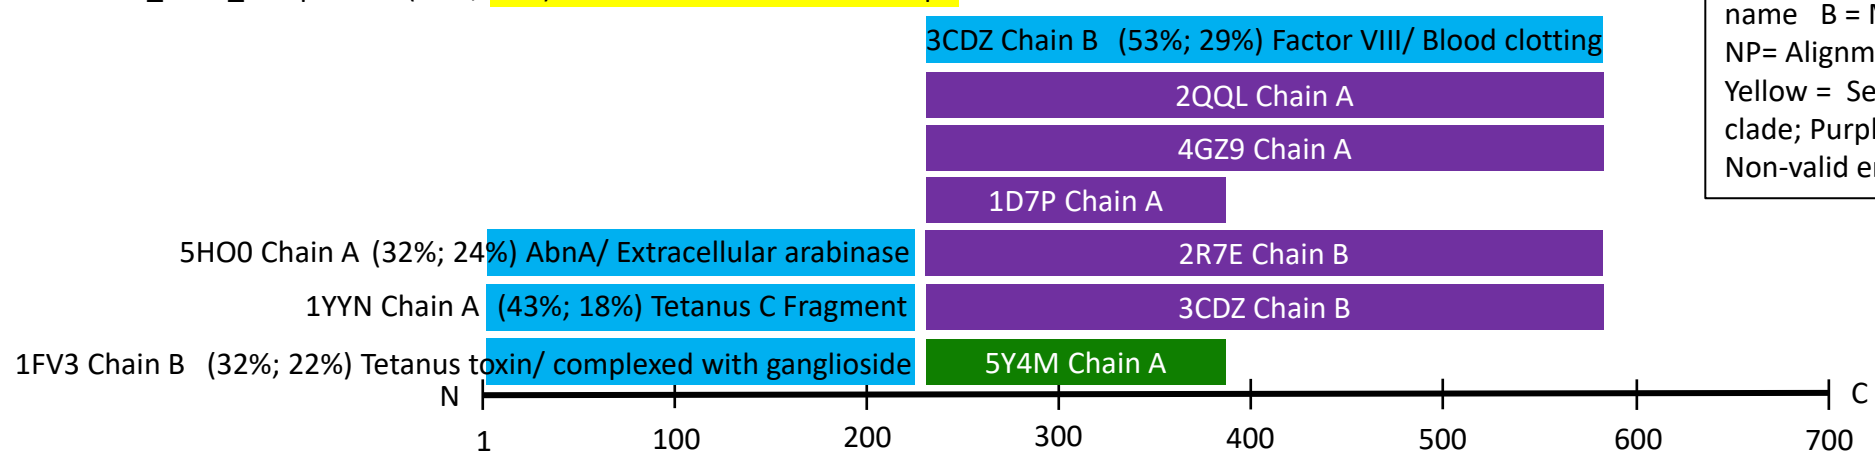

**Key:** (X%; Y%) A / B X = Alignment coverage Y = %ID between query and temple A = Molecule name B = Molecule description NP= Alignment & %ID not provided by Phyre2; Yellow = Sequence from database; Green = same clade; Purple = Earlier common ancestor; Red = Non-valid entry; Blue = Not in tree

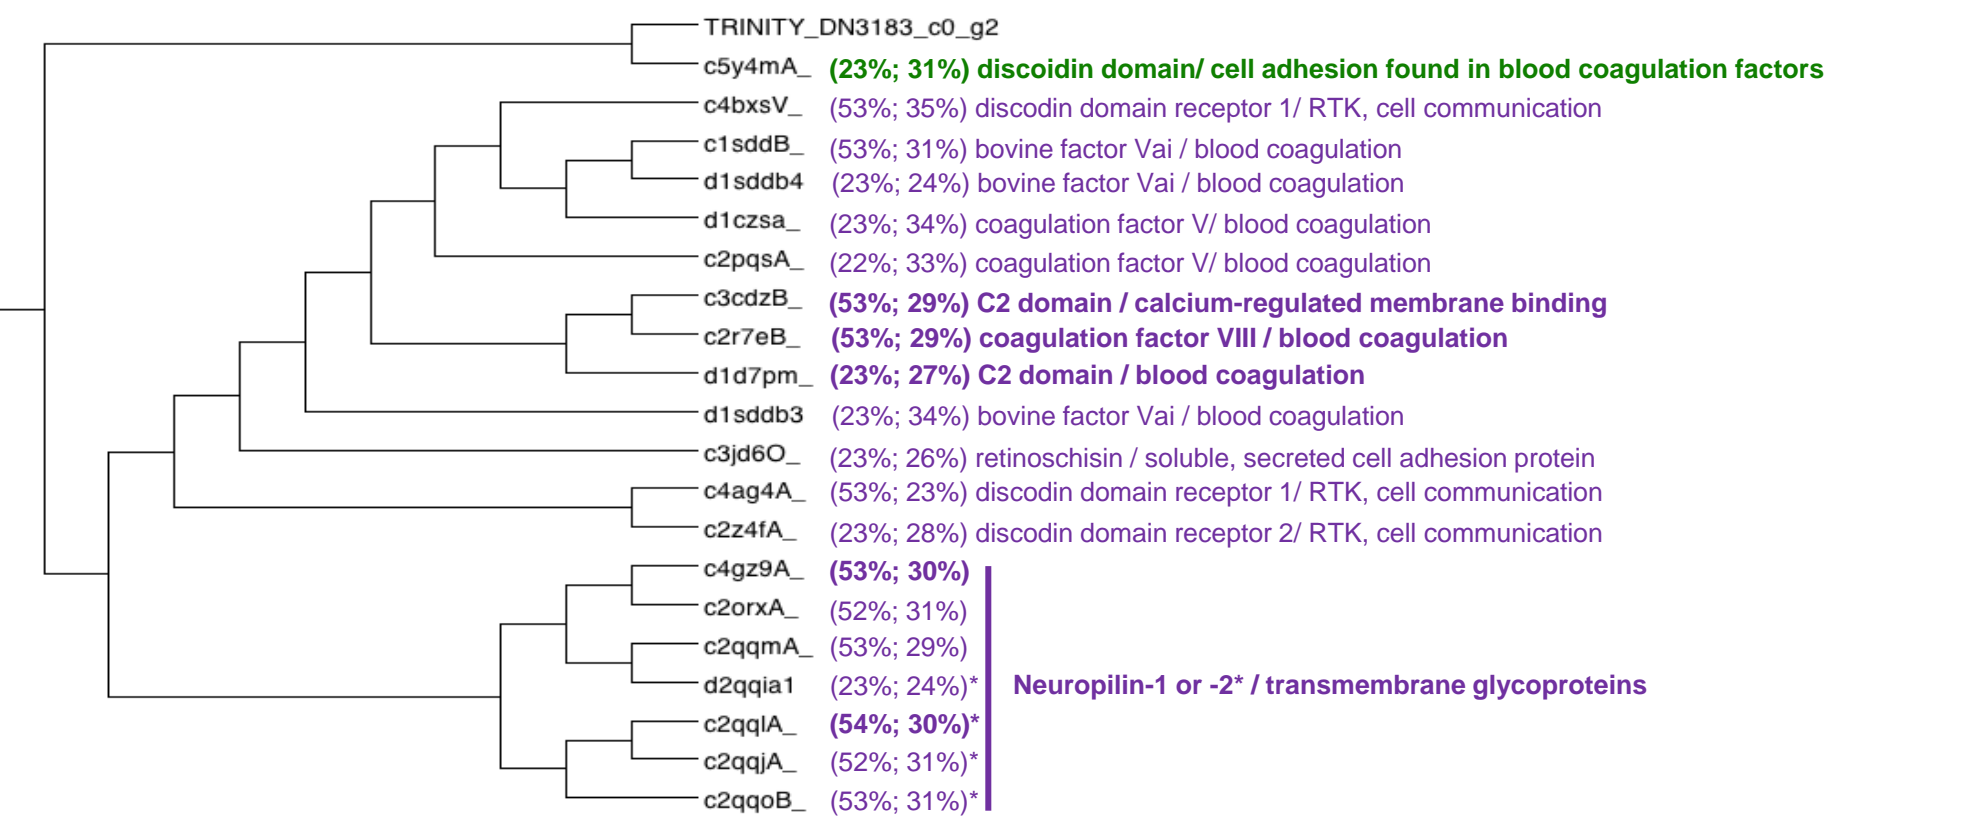

Supplement: peerj-09-12606-s002.pdf [file peerj-09-12606-s002.pdf]
