# Supplementary material for: The cnidarian parasite Ceratonova shasta utilizes inherited and recruited venom-like compounds during infection
Source: PubMed Central journal article supplement (PMC8684318; doi:10.7717/peerj.12606), 2021-12-15

“Inherited” venom-like compounds

TRINITY\_DN4616\_c0\_g1  
C-type Lectin

- Class
- Myxosporea
  - Malacosporea
  - Polypodiozoa
  - Hydrozoa
  - Anthozoa
  - Porifera

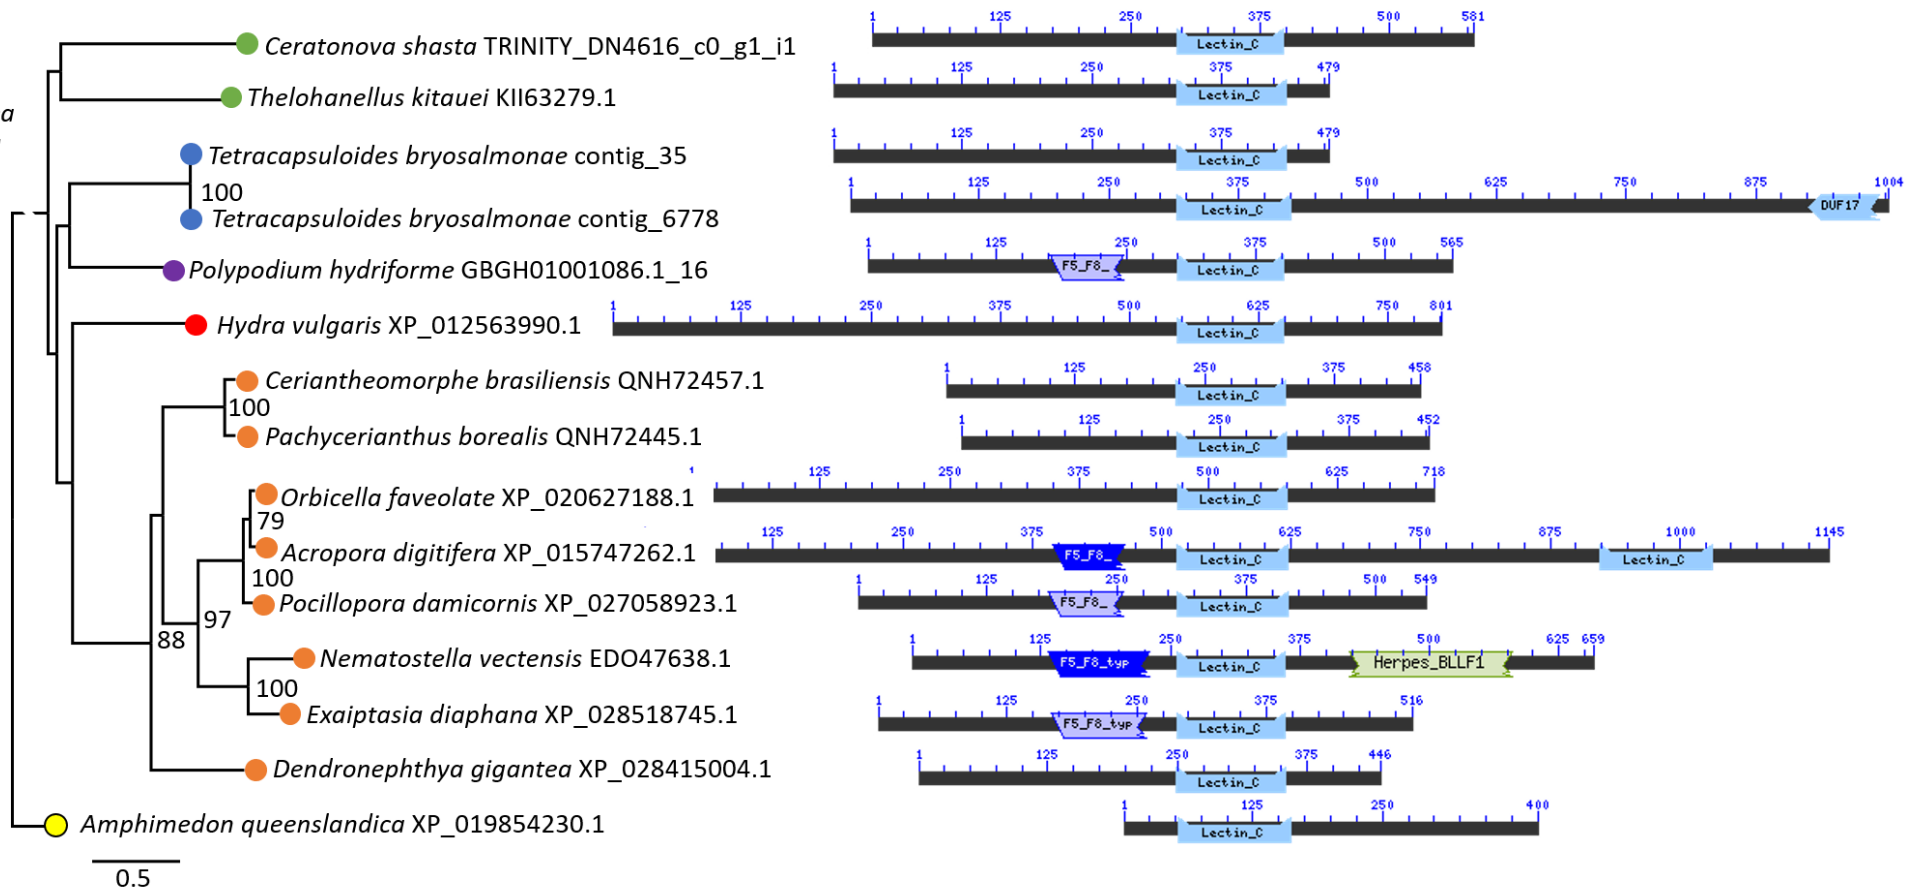

TRINITY\_DN40342\_c1\_g1  
Hyaluronidase

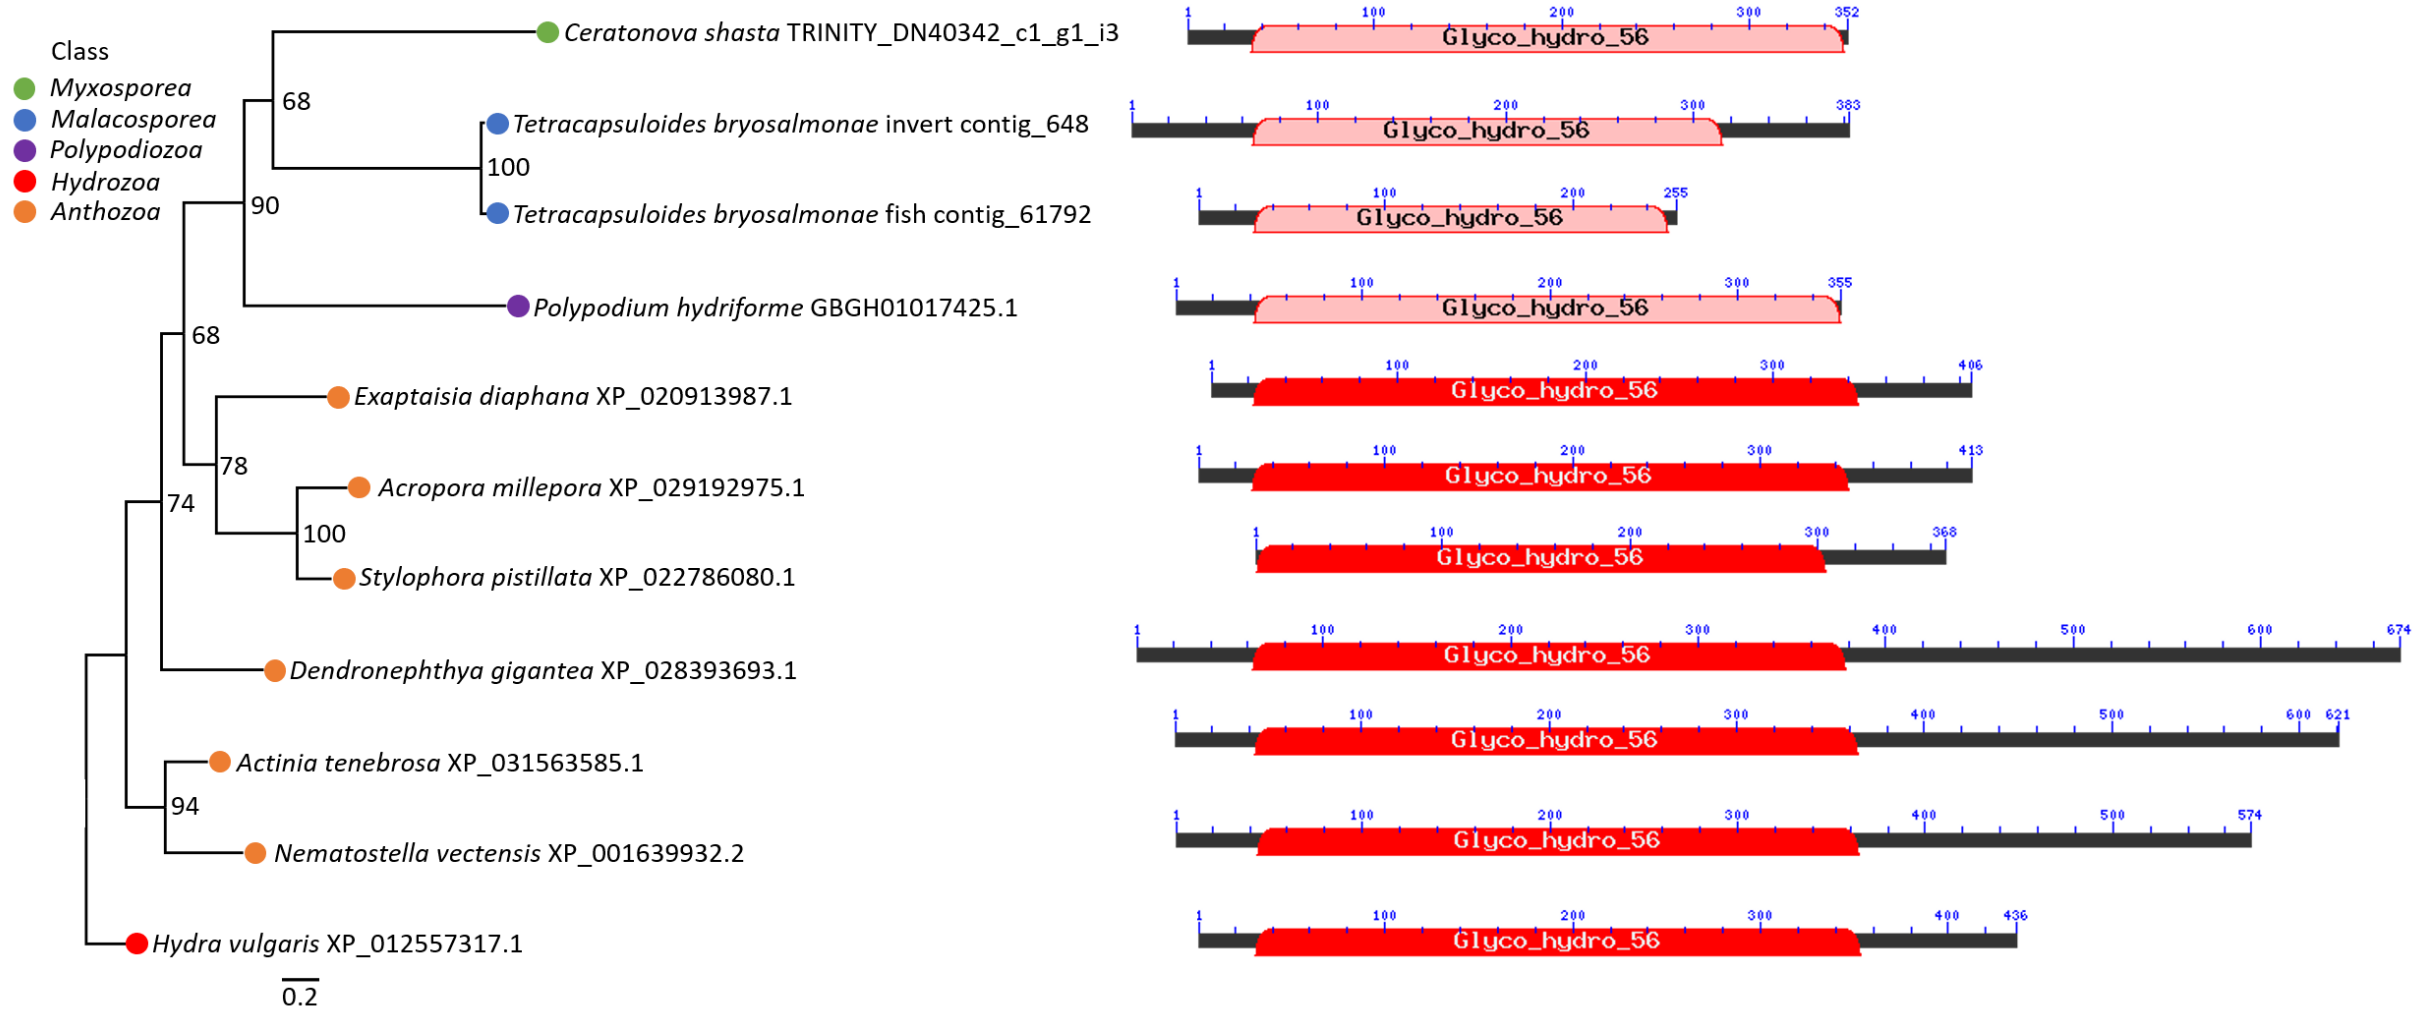

# TRINITY\_DN3183\_c1\_g2 Lactadherin

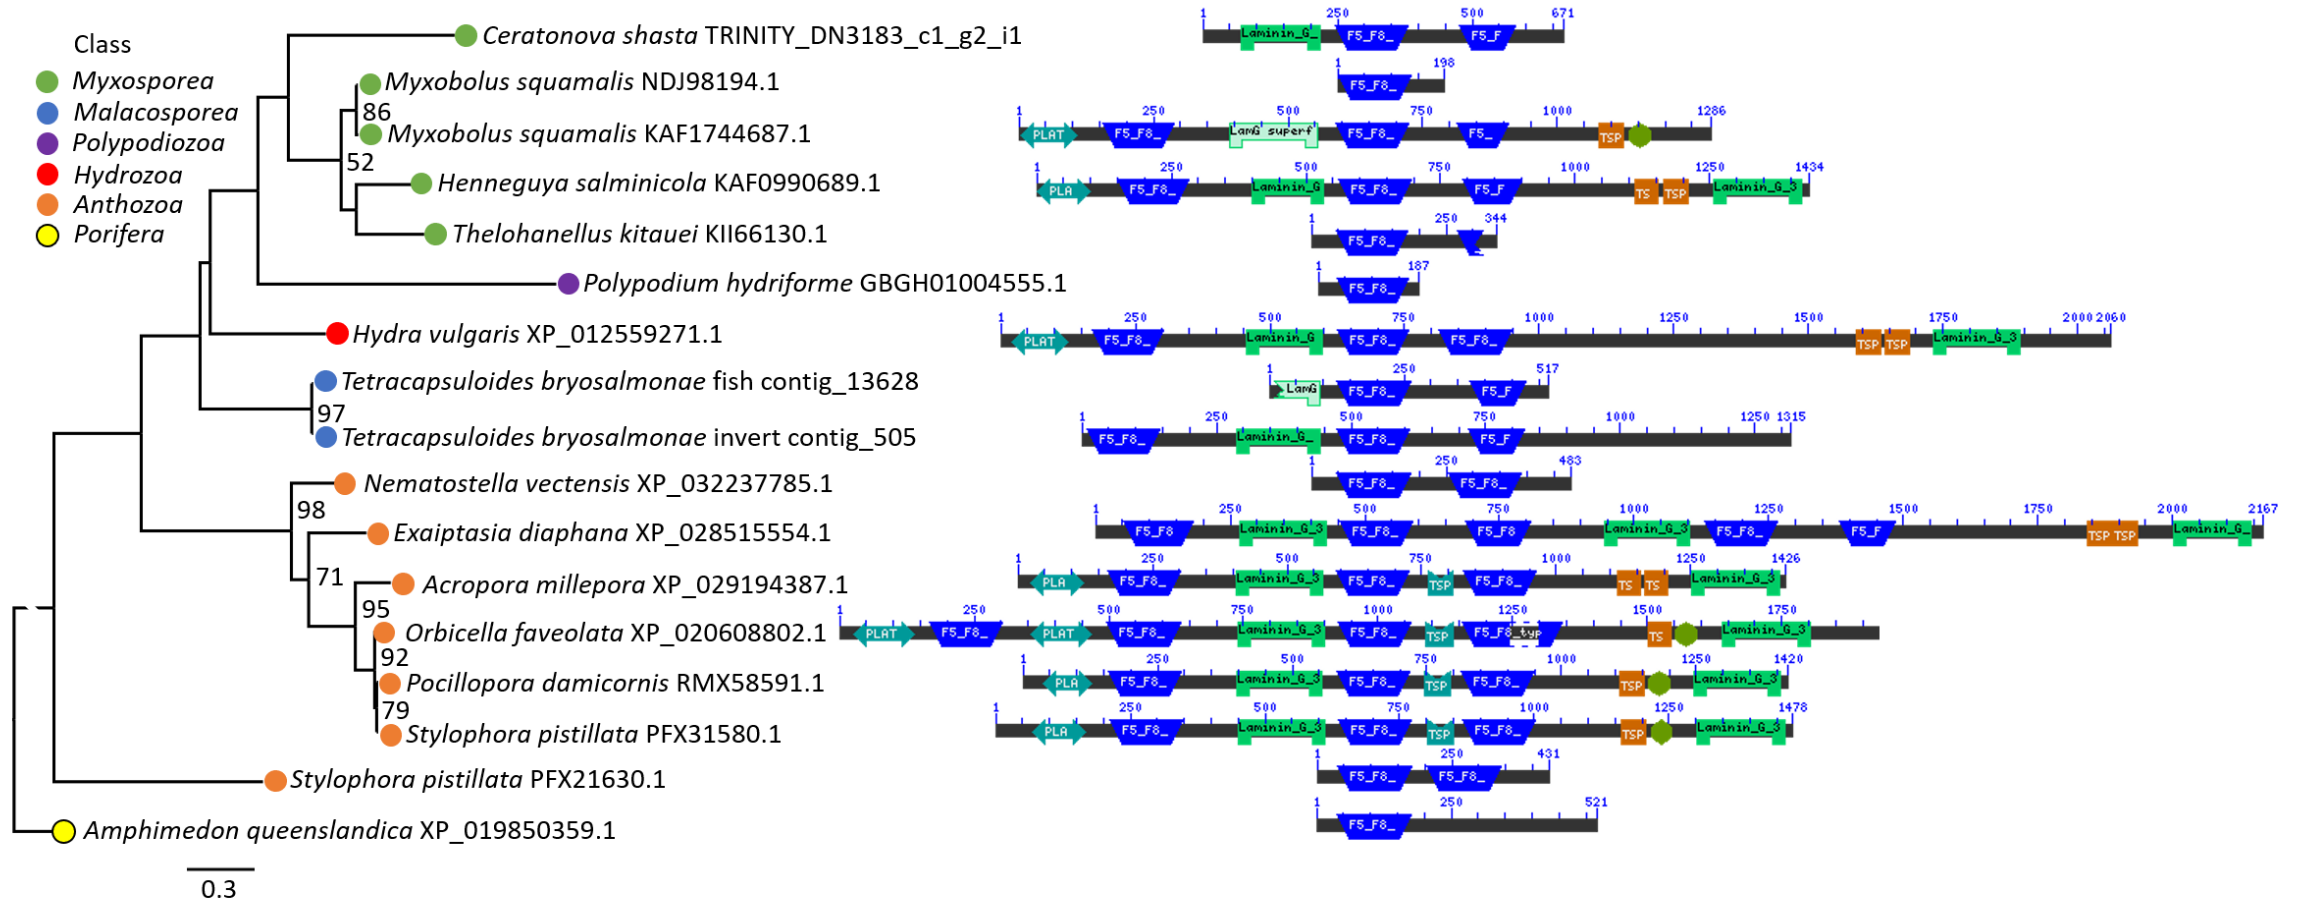

“Recruited” venom-like compounds

TRINITY\_DN25741\_c0\_g1  
Metallopeptidase

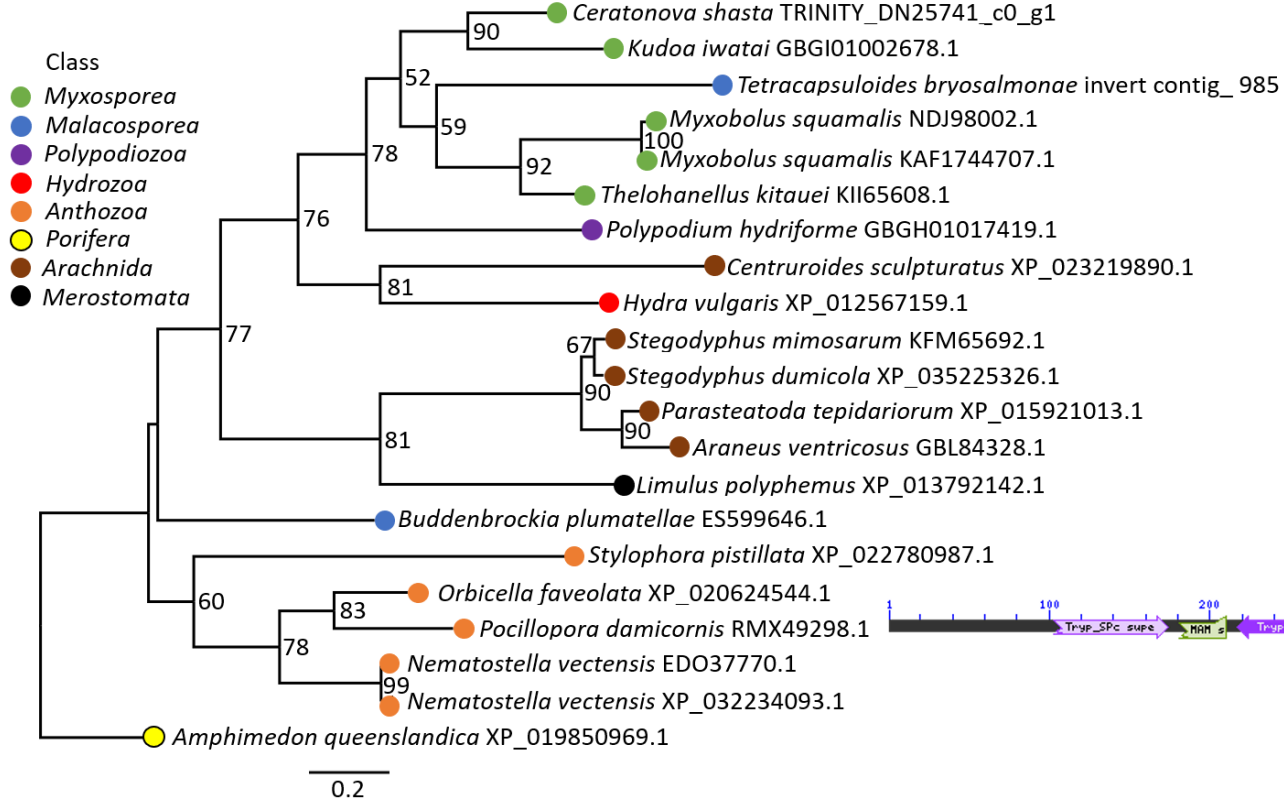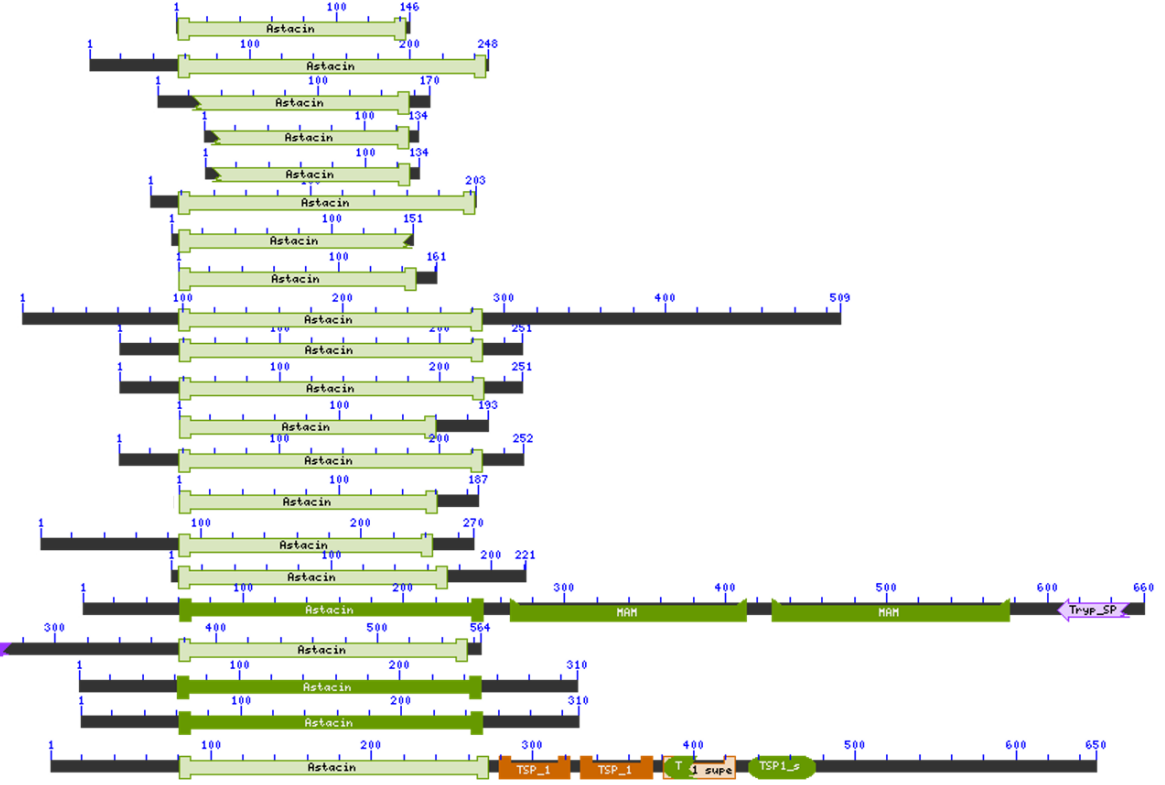

TRINITY\_DN29246\_c0\_g1  
Metallopeptidase

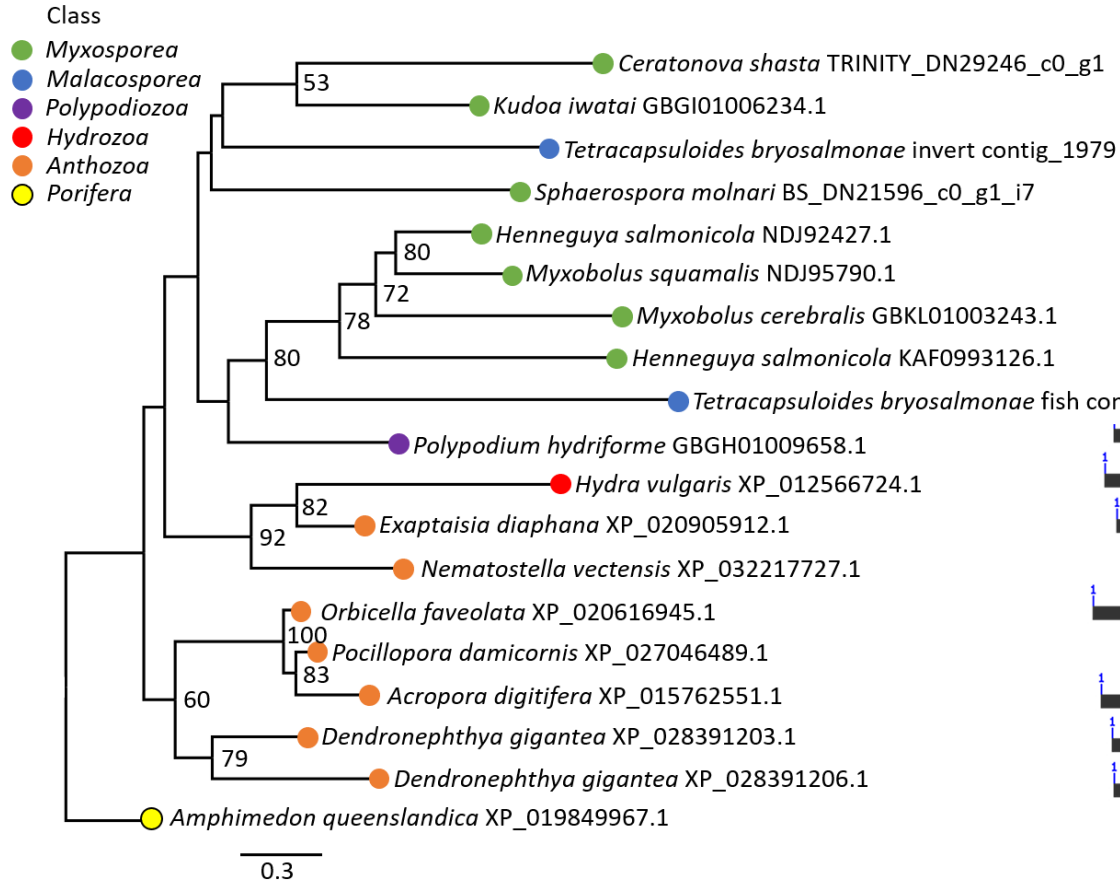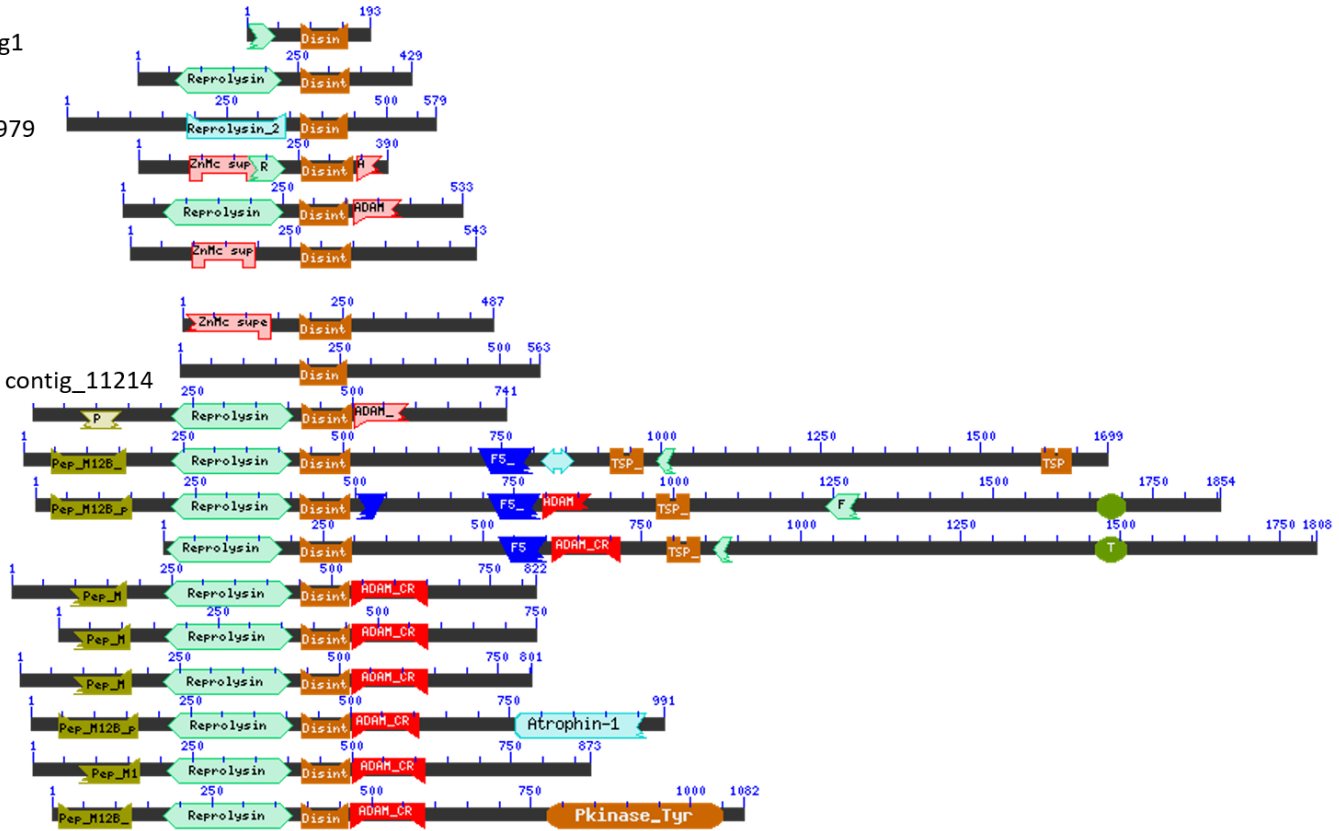

TRINITY\_39886\_c1\_g1  
Kunitz-type protein

- Class
- Myxosporea
  - Malacosporea
  - Polypodiozoa
  - Hydrozoa
  - Anthozoa
  - Porifera

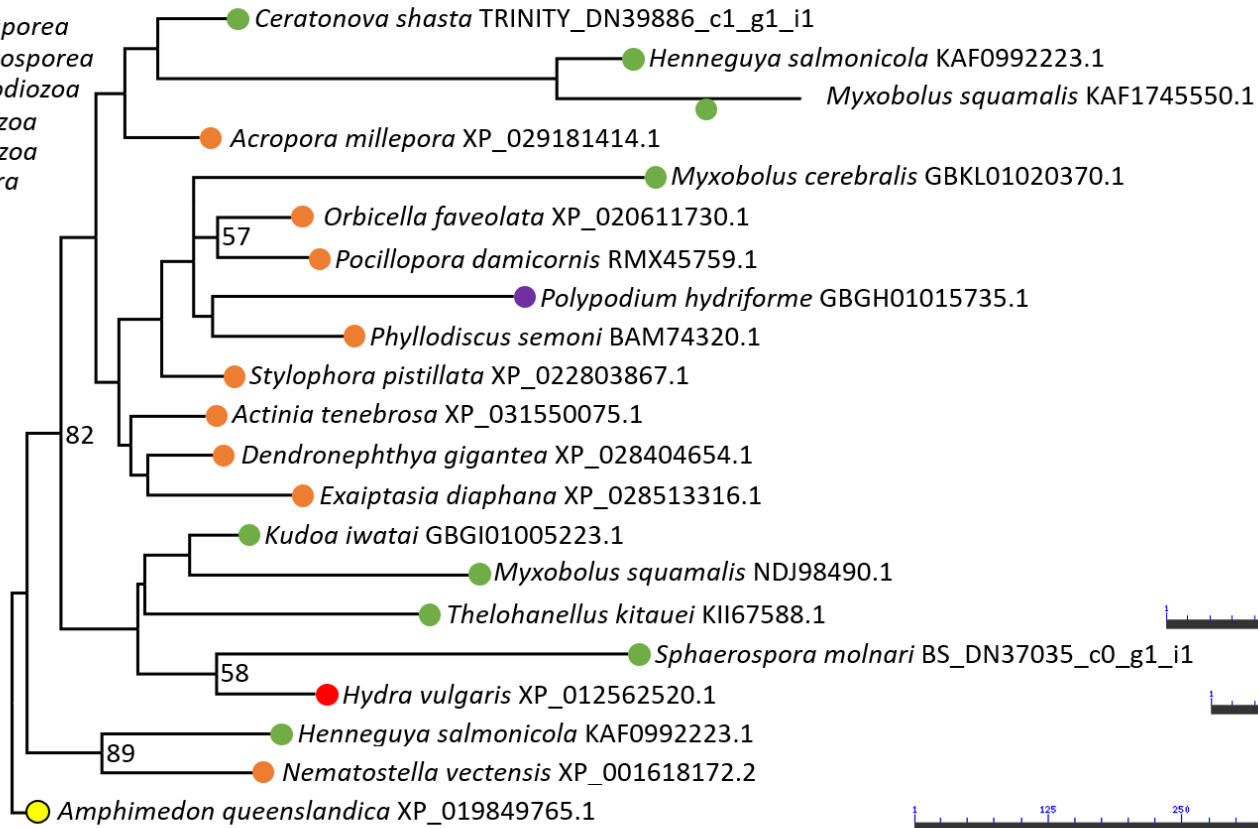

0.4

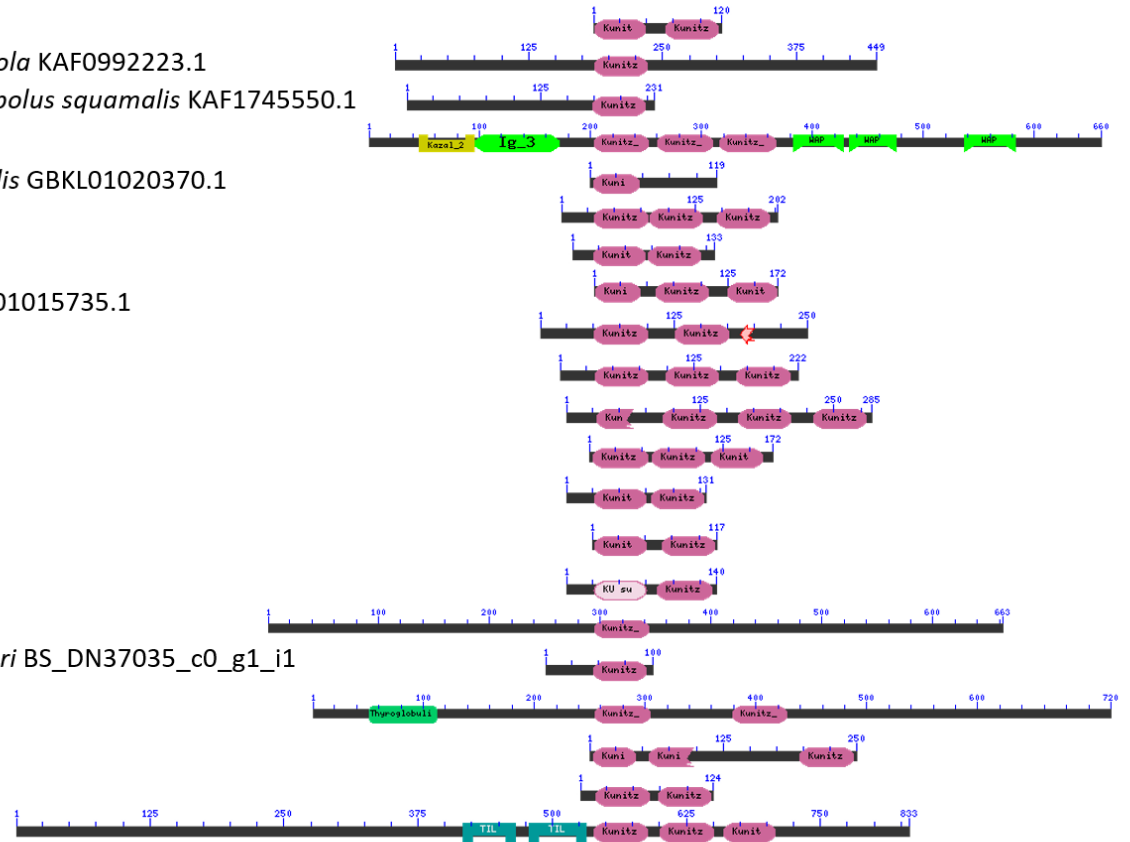



TRINITY\_DN40098\_c2\_g1  
Kunitz-type protein

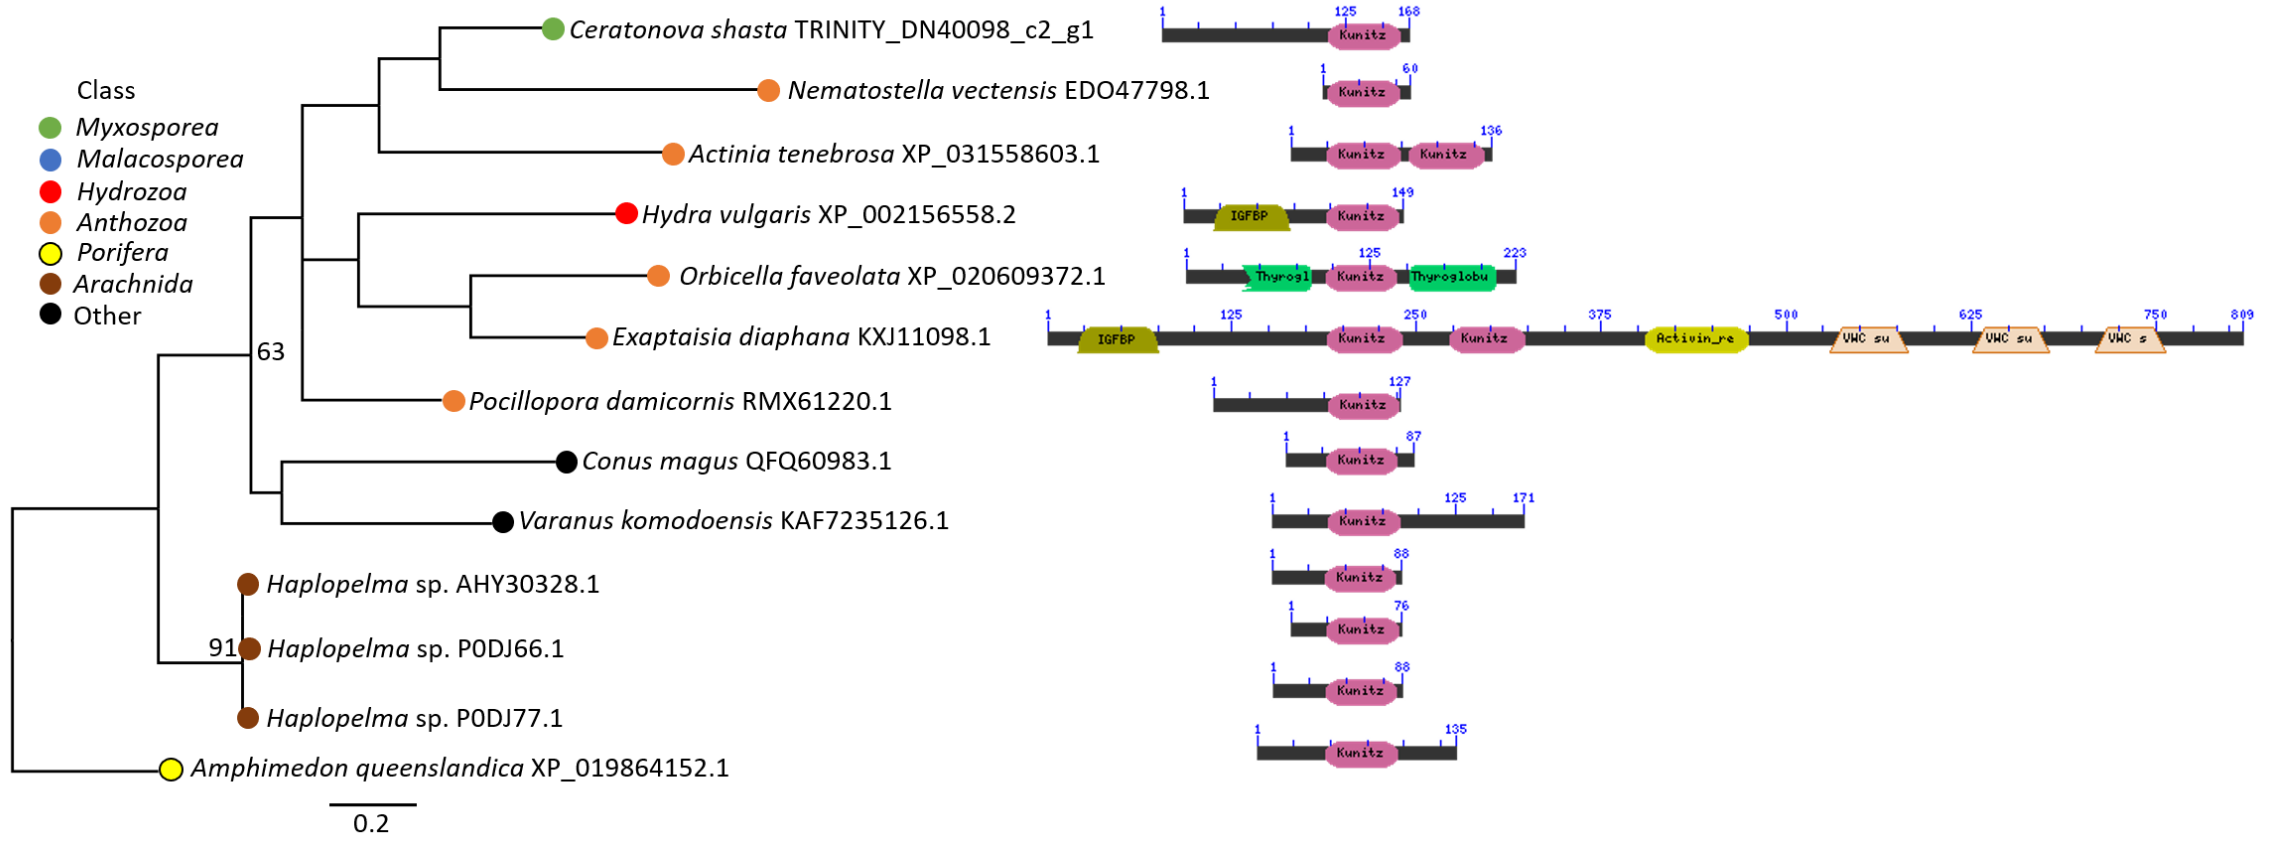

TRINITY\_DN40387\_c0\_g2  
Peptidase inhibitor 16

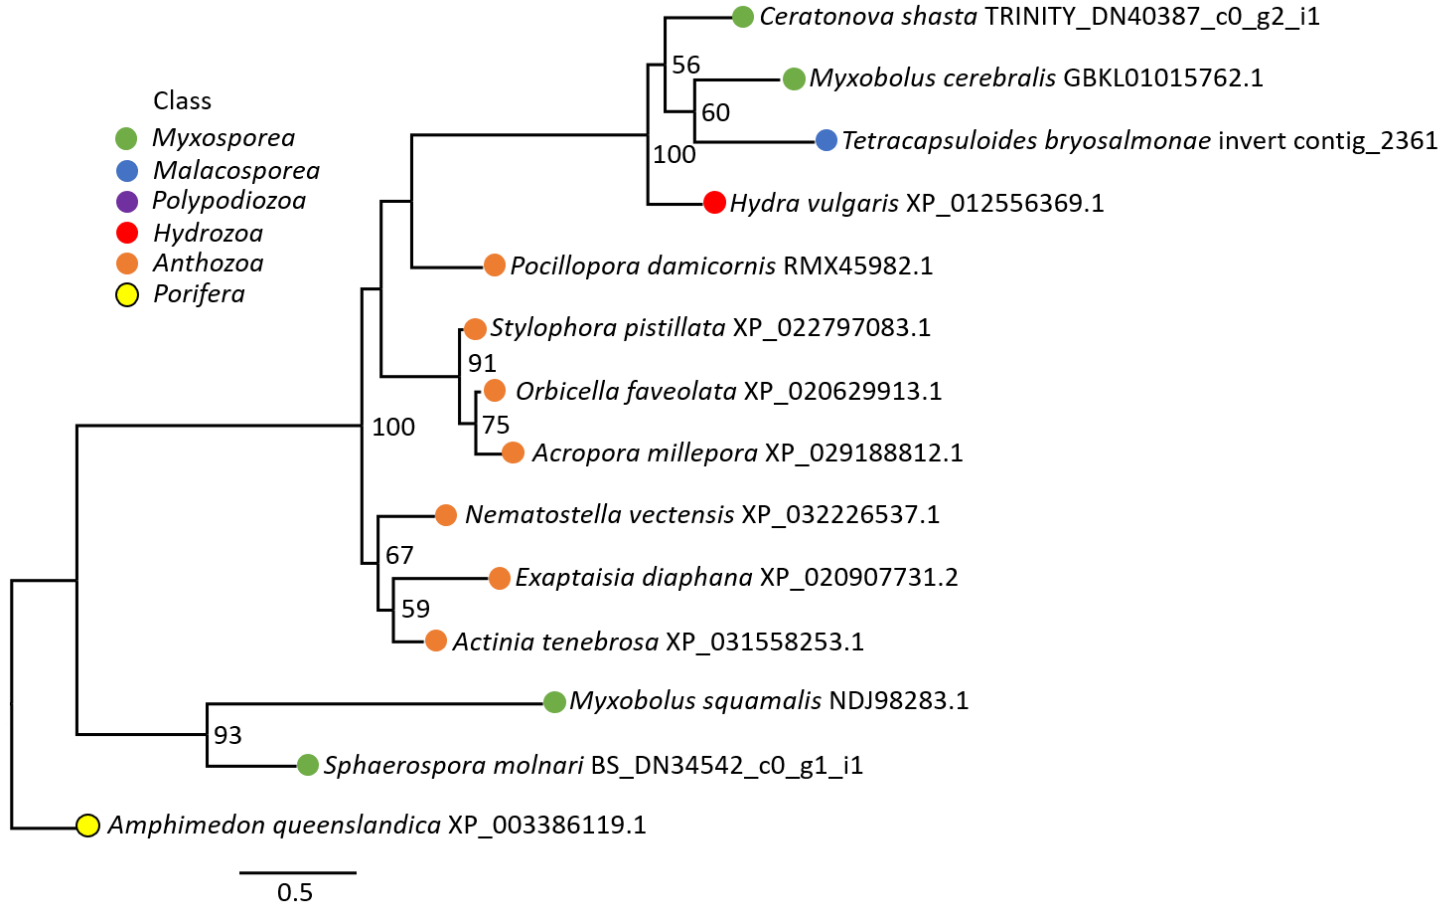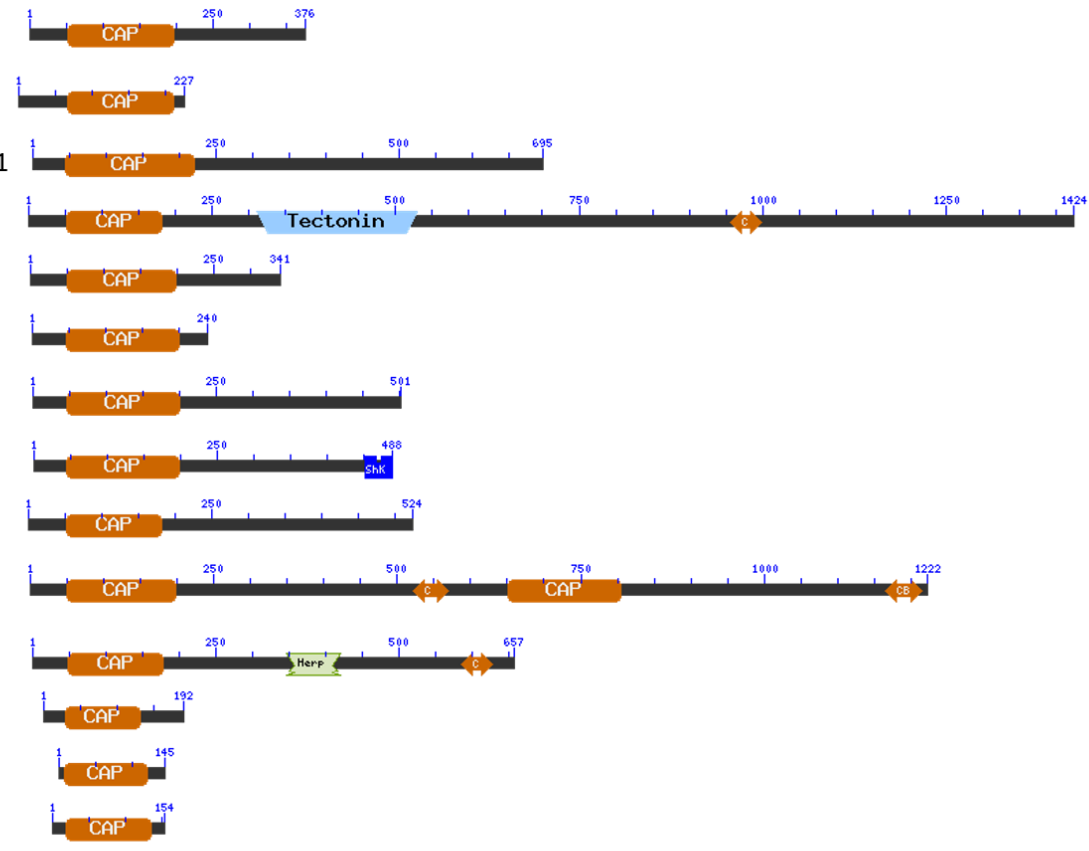

TRINITY\_DN55967\_c1\_g1  
Peptidase inhibitor 16

- Class
- Myxosporea
  - Malacosporea
  - Polypodiozoa
  - Hydrozoa
  - Anthozoa
  - Porifera

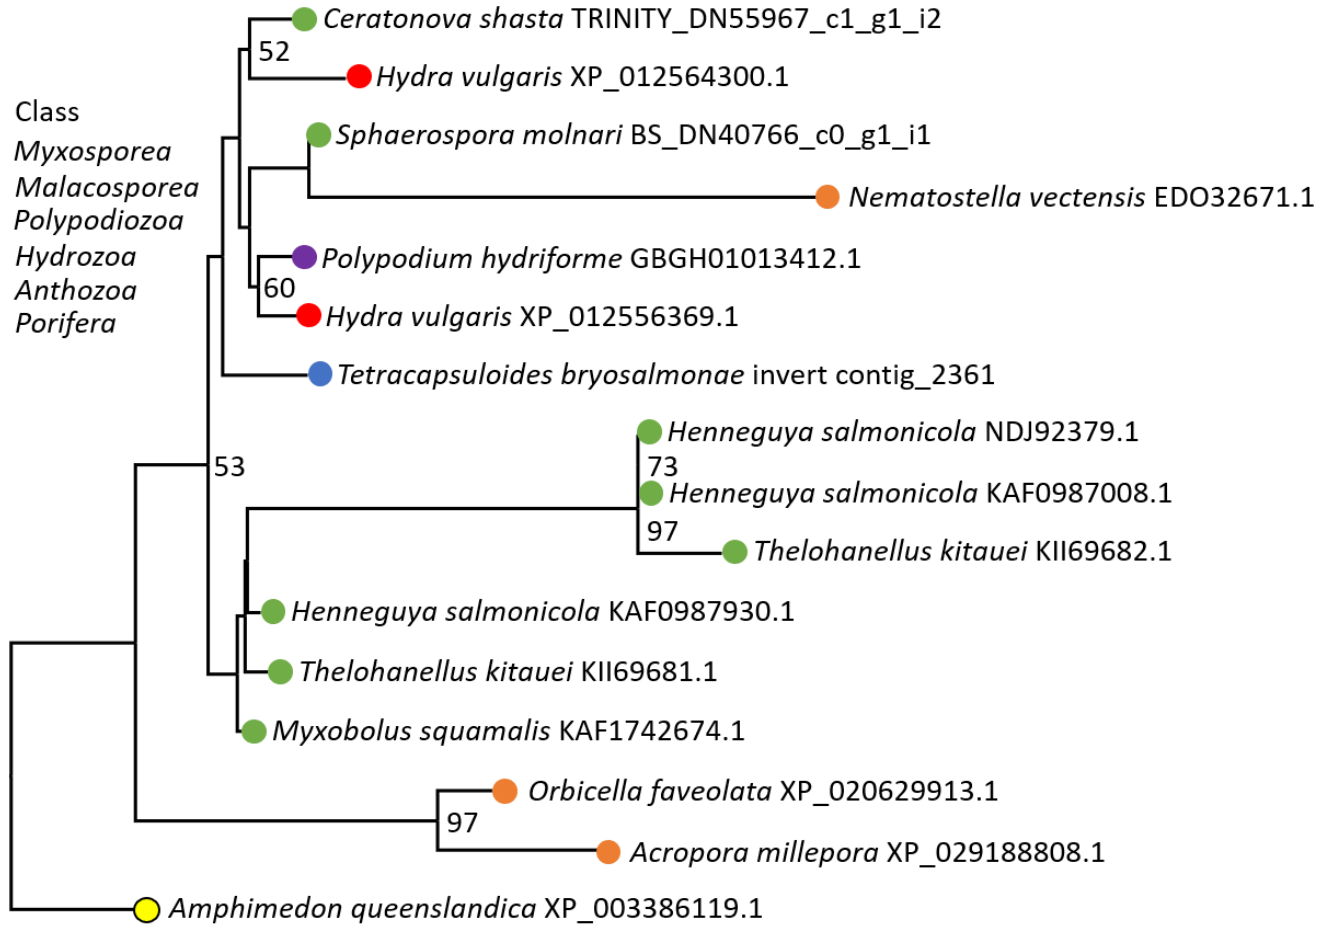

0.5

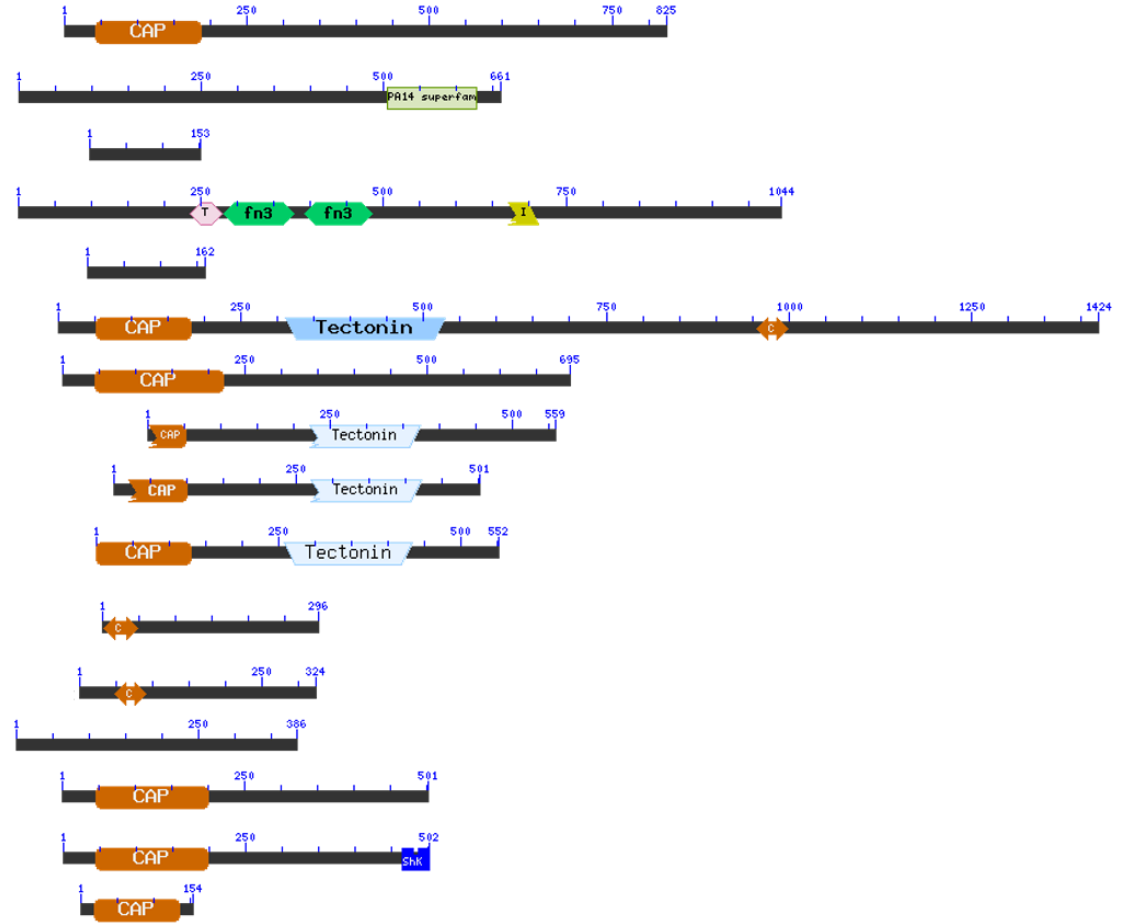

Supplement: peerj-09-12606-s003.pdf [file peerj-09-12606-s003.pdf]
